1  
2  
3  
4  
5  
6  
7  
8  
9  
10  
11  
12  
13  
14  
15  
16  
17  
18  
19  
20  
21

**The mitochondrial Ca<sup>2+</sup> uniporter MCU is required for normal glucose-stimulated insulin secretion *in vitro* and *in vivo***

Elizabeth Haythorne<sup>1†</sup>, Eleni Georgiadou<sup>1†</sup>, Matthew T. Dickerson<sup>2</sup>, Livia Lopez-Noriega<sup>1</sup>, Timothy J. Pullen<sup>1</sup>, Gabriela da Silva Xavier<sup>1</sup>, Samuel P.X. Davis<sup>4</sup>, Aida Martinez-Sanchez<sup>1</sup>, Francesca Semplici<sup>1</sup>, Rosario Rizzuto<sup>3</sup>, James A. McGinty<sup>4</sup>, Paul M. French<sup>4</sup>, Matthew C. Cane<sup>1</sup>, David A. Jacobson<sup>2</sup>, Isabelle Leclerc<sup>1</sup> and Guy A. Rutter<sup>1\*</sup>

<sup>1</sup>Section of Cell Biology and Functional Genomics, Division of Diabetes, Endocrinology and Metabolism, Department of Medicine, Imperial College London, London W12 0NN, UK

<sup>2</sup>Department of Molecular Physiology and Biophysics, Vanderbilt University, Nashville, TN 37232, USA

<sup>3</sup>Department of Biomedical Sciences, University of Padova, Padua, Italy

<sup>4</sup>Photonics Group, Department of Physics, Imperial College London, London, SW7 2AZ, UK

Word count: 3920

†Equal contributions

\*Address correspondence to Professor Guy A. Rutter, [g.rutter@imperial.ac.uk](mailto:g.rutter@imperial.ac.uk) and +44 20 759 43340

## 22 Abstract

23 Mitochondrial oxidative metabolism is central to glucose-stimulated insulin secretion (GSIS).  
24 Whether  $\text{Ca}^{2+}$  uptake into pancreatic  $\beta$ -cell mitochondria potentiates or antagonises this process  
25 is still a matter of debate. Although the mitochondrial importer (MCU) complex is thought to  
26 represent the main route for  $\text{Ca}^{2+}$  transport across the inner mitochondrial membrane, its role  
27 in  $\beta$ -cells has not previously been examined *in vivo*. Here, we inactivated the pore-forming  
28 subunit MCUa (MCU) selectively in the  $\beta$ -cell in mice using *Ins1*Cre-mediated recombination.  
29 Glucose-stimulated mitochondrial  $\text{Ca}^{2+}$  accumulation, ATP production and insulin secretion  
30 were strongly ( $p < 0.05$  and  $p < 0.01$ ) inhibited in *MCU* null animals ( $\beta$ MCU-KO) *in vitro*.  
31 Interestingly, cytosolic  $\text{Ca}^{2+}$  concentrations increased ( $p < 0.001$ ) whereas mitochondrial  
32 membrane depolarisation improved in  $\beta$ MCU-KO animals. Male  $\beta$ MCU-KO mice displayed  
33 impaired *in vivo* insulin secretion at 5 ( $p < 0.001$ ) but not 15 min. post intraperitoneal (IP)  
34 injection of glucose while the opposite phenomenon was observed following an oral gavage at  
35 5 min. Unexpectedly, glucose tolerance was improved ( $p < 0.05$ ) in young  $\beta$ MCU-KO (<12  
36 weeks), but not older animals. We conclude that MCU is crucial for mitochondrial  $\text{Ca}^{2+}$  uptake  
37 in pancreatic  $\beta$ -cells and is required for normal GSIS. The apparent compensatory mechanisms  
38 which maintain glucose tolerance in  $\beta$ MCU-KO mice remain to be established.

39

## 40 **Introduction**

41 Defective insulin secretion underlies diabetes mellitus, a disease affecting almost 1 in 8 of the  
42 adult population worldwide (<https://www.idf.org/>). The most prevalent form of this condition  
43 is Type 2 diabetes (T2D) where pancreatic  $\beta$ -cell failure usually, though not always, occurs in  
44 the face of insulin resistance in other tissues (1). Current therapeutic strategies have limited  
45 efficacy and there remains a desperate need to develop more effective treatments to tackle this  
46 growing epidemic.

47 Pancreatic  $\beta$ -cells ensure blood glucose homeostasis by responding to a rise in circulating  
48 nutrient levels with insulin secretion. Glucose-induced increases in mitochondrial oxidative  
49 metabolism are central to the stimulation of insulin secretion, and drive an increase in cytosolic  
50 ATP:ADP ratio, closure of ATP-sensitive  $K^+$  ( $K_{ATP}$ ) channels,  $Ca^{2+}$  influx and exocytosis (2).  
51  $Ca^{2+}$  ions are also taken up by mitochondria (3; 4) and this has been suggested to activate  
52 tricarboxylate (TCA) cycle and other intra-mitochondrial enzymes (5) in order to enhance the  
53 production of reducing equivalents for the electron transport chain and ATP generation (2).  
54 Although a number of approaches have been used previously to explore the role of intra-  
55 mitochondrial  $Ca^{2+}$  in controlling insulin secretion, the role of these ions in modifying ATP  
56 synthesis, and hence exocytosis, in these cells is still debated (6; 7).

57 Importantly, there is accumulating evidence to suggest that mitochondrial dysfunction in the  
58 pancreatic  $\beta$ -cell leads to impaired glucose-stimulated insulin secretion and may contribute to  
59 the development of T2D (8). Moreover, glucolipotoxicity impairs mitochondrial  $Ca^{2+}$  uptake  
60 in isolated  $\beta$ -cells (9), suggesting a possible role in defective secretion under these conditions.

61 The mitochondrial  $Ca^{2+}$  uniporter (MCU) forms the  $Ca^{2+}$ -selective pore of a multiprotein MCU-  
62 complex including MCUa [MCU], MICU1-3, MICUR1, and EMRE which allows  $Ca^{2+}$  entry

63 into mitochondria (10). *In vitro* and *in vivo* models of MCU silencing or ablation have revealed  
64 a robust reduction in mitochondrial  $\text{Ca}^{2+}$  uptake associated with blunted  $\text{Ca}^{2+}$ -dependent  
65 activation of the TCA cycle, oxygen consumption, ATP production (9; 11; 12) and  
66 mitochondrial reactive oxygen species generation (13). Whole body *Mcu* knockout (KO) mice  
67 display normal basal cardiac parameters even though mitochondria isolated from cardiac  
68 myocytes display impaired  $\text{Ca}^{2+}$  uptake and  $\text{Ca}^{2+}$ -dependent oxygen consumption.  
69 Interestingly, resting ATP levels are unaltered in muscle cells in *Mcu*-KO mice, suggesting that  
70 MCU depletion does not affect basal mitochondrial metabolism. *Mcu*-KO mice similarly  
71 display only reduced maximal muscle power in association with reduced metabolic flux and  
72 activity of TCA cycle enzymes in skeletal muscle mitochondria (11). Given that both cardiac  
73 and skeletal muscles are highly metabolically active tissues, it is surprising that whole body  
74 *Mcu*-KO mice display a mild phenotype (11-13). However, glucose homeostasis and insulin  
75 secretion were not examined in detail in these earlier studies.

76 We have previously shown that reducing glucose-stimulated mitochondrial  $\text{Ca}^{2+}$  uptake in  
77 rodent pancreatic  $\beta$ -cells through knockdown of *MCU* *in vitro* impairs the sustained increase  
78 in ATP:ADP ratio usually seen in response to high glucose and ablates sulfonylurea-stimulated  
79 insulin secretion (9; 14). Similar findings were also made in clonal  $\beta$ -cells (15). However, these  
80 earlier studies provided no insights as to the impact of reducing mitochondrial  $\text{Ca}^{2+}$  uptake on  
81 glucose-stimulated insulin secretion *in vivo*, nor how this may, in turn, impact the physiology  
82 of the living animal.

83 Tissue-specific manipulation of MCU activity provides an alternative and powerful means to  
84 examine the role of mitochondrial  $\text{Ca}^{2+}$  in particular tissue or cell type. In the present study we  
85 have therefore generated mice in which *Mcu* is deleted highly selectively in the pancreatic  $\beta$ -  
86 cell, and explored the impact on insulin secretion and whole body glucose homeostasis. We

87 show that mitochondrial  $\text{Ca}^{2+}$  uptake, glucose-induced ATP increases and insulin secretion are  
88 substantially impaired *in vitro* in dissociated or islets from KO mice. Insulin release is also  
89 impaired in the living mouse, despite improvements in glucose tolerance.

90

## 91 **Materials and Methods**

### 92 *Generation of $\beta$ -cell specific MCU-KO mice*

93 All *in vivo* procedures were approved by the UK Home Office according to the Animals  
94 (Scientific Procedures) Act 1986. Animals were fed *ad libitum* with a standard mouse chow  
95 diet (Research Diets, Inc) unless otherwise stated. For high fat/sucrose diet (HFHS) treatment,  
96 mice were placed on diet at 5-6 weeks of age for 2 weeks (58% [wt/wt] fat and sucrose content;  
97 Research Diets, Inc) prior to analysis.

98 C57BL/6J mice bearing *Mcu* (also termed *Ccdc109a* and *C10orf42*) alleles with *FloxP* sites  
99 flanking exons 11 and 12 were generated by GenOway (Grenoble, Fr) and bred to animals  
100 carrying *Cre* recombinase inserted at the *Ins1* locus (*Ins1Cre*) (16). Use of this *Cre* line allowed  
101 efficient and  $\beta$ -cell-selective deletion of both *Mcu* splice variants ( $\beta$ MCU-KO), without  
102 recombination in the brain or confounding expression of human growth hormone. Mice bearing  
103 *floxed Mcu* alleles but lacking *Cre* recombinase were used as littermate controls (WT).  
104 Possession of *Ins1Cre* alleles alone exerted no effect on glycaemic phenotype (not shown). The  
105 sequences of primers used for genotyping and qRT-PCR for *Mcu*, *Kcnj11* and *Abcc8* are  
106 provided under Supplemental Tables 1 and 2.

107 For measurements of mRNA levels, pancreatic islets were isolated by collagenase digestion  
108 (17). Deletion of *Mcu* was determined using quantitative real-time PCR. RNA was extracted  
109 from islets using Trizol (Invitrogen) and reverse transcribed using a high capacity reverse  
110 transcription kit (Invitrogen) (18). Relative gene expression was determined using SYBR  
111 Green (Invitrogen), and expression of *Mcu* was normalised to  $\beta$ -actin mRNA.

112

113 *Intraperitoneal glucose, insulin tolerance tests and measurement of insulin secretion in vivo*

114 To investigate glucose tolerance, male or female mice (ages 8-24 weeks as indicated) were  
115 fasted overnight for 16 h before injection of glucose solution (20% w/v, 1g/kg body weight)  
116 intraperitoneally. Glucose was measured in tail vein blood at 0, 5, 15, 30, 60, 90 and 120 min.  
117 using an ACCU-CHECK Aviva glucometer (Roche) (19).

118 To ascertain insulin tolerance, mice were fasted for 5 h before human insulin (0.75 units/kg  
119 body weight, Sigma Aldrich) was injected intraperitoneally. Blood glucose was measured in  
120 tail vein blood at 0, 15, 30 and 60 min. (19).

121 For *in vivo* insulin secretion experiments, animals were fasted overnight for 16 h and glucose  
122 (20% w/v, 3 g/kg body weight) was either given intraperitoneally or oral gavage. Plasma was  
123 separated by centrifugation and insulin was measured using an ultra-sensitive mouse insulin  
124 ELISA kit (CrystalChem).

125 *Single cell fluorescence imaging*

126 Pancreatic islets were isolated as above, dissociated into single  $\beta$ -cells and plated onto glass  
127 coverslips (9; 20). Mitochondrial  $\text{Ca}^{2+}$  uptake was measured via adenovirus-mediated delivery  
128 of a mitochondrially-targeted recombinant  $\text{Ca}^{2+}$  probe, R-GECO (21). Cells were infected and  
129 incubated for 48 h prior to imaging in Krebs-Ringer bicarbonate buffer (140 mM NaCl, 3.6  
130 mM KCl, 0.5 mM  $\text{NaH}_2\text{PO}_4$ , 2 mM  $\text{NaHCO}_3$  (saturated with  $\text{CO}_2$ ), 1.5 mM  $\text{CaCl}_2$ , 0.5 mM  
131  $\text{MgSO}_4$ , 10 mM HEPES and 3 mM D-glucose, pH7.4). To examine ATP:ADP changes in  
132 response to a rise in extracellular glucose concentration, dissociated  $\beta$ -cells were infected with  
133 an adenovirus bearing cDNA encoding the ATP sensor Perceval (9) and incubated for 48 h  
134 prior to fluorescence imaging. In all experiments, cells were equilibrated for at least 30 min. in  
135 Krebs-Ringer bicarbonate containing 3 mM glucose prior to the start of acquisitions.

136 Excitation/emission wavelengths were (nm): 490/630 and 410/630 (Fura-Red), 530/590 (R-  
137 GECO) and 470/535 (Perceval). All imaging experiments were performed using an Olympus  
138 IX71 microscope with 40x magnification objective, an F-View-II camera and an MT-20  
139 excitation system equipped with a Hg/Xe arc lamp with image capture at 0.2 Hz excitation time  
140 50 ms).

141 For experiments with tetramethylrhodamine (TMRE),  $\beta$ -cells were loaded with 10nM TMRE  
142 in imaging buffer (140 mM NaCl, 3.6 mM KCl, 0.5 mM NaH<sub>2</sub>PO<sub>4</sub>, 24 mM NaHCO<sub>3</sub> (saturated  
143 with CO<sub>2</sub>), 1.5 mM CaCl<sub>2</sub>, 0.5 mM MgSO<sub>4</sub>, 10 mM HEPES and 3 mM glucose) for 45 min.  
144 and re-equilibrated with 2nM TMRE for 10 min. before recordings. TMRE (2nM) was present  
145 throughout, and cells excited at 550 nm. FCCP (Carbonyl cyanide-4-phenylhydrazone, 1  $\mu$ M)  
146 was administrated as indicated and imaging performed using a Zeiss AxioObserver microscope  
147 using 63x 1.4NA oil objective, a Hamamatsu Flash 4 camera and an LED (light emitting diode)  
148 excitation system (excitation filter 534/20nm and emission filter 572/28nm) at 0.3 Hz (250 ms  
149 exposure). Traces represent mean normalised fluorescence intensity ( $F/F_{\min}$ ) over time, where  
150  $F_{\min}$  is the average fluorescence recorded at 3mM glucose.

#### 151 *Whole islet fluorescence imaging*

152 Ca<sup>2+</sup> imaging of whole islets was performed after loading with Cal-520 AM (Stratech; 2  $\mu$ M),  
153 or mito Pericam adenovirus (MOI 100), and perfusion in Krebs-Ringer bicarbonate buffer  
154 containing 3mM or 17mM glucose, 17mM glucose with 0.1mM diazoxide or 20mM KCl.  
155 Images were captured at 0.5Hz on a Zeiss Axiovert microscope equipped with a 10X 0.3–0.5  
156 NA oil immersion objective, coupled to a Nipkow spinning-disk head (Yokogawa CSU-10)  
157 and illuminated at 491nm. Data were analysed using ImageJ with a purpose-designed macro  
158 (available upon request).



159 *In vitro insulin secretion*

160 Insulin secretion assays were performed on islets isolated from male mice (8-10 weeks) (24).  
161 Secreted and total insulin were quantified using a homogeneous time-resolved fluorescence  
162 (HTRF) insulin kit (Cisbio) in a PHERAstar reader (BMG Labtech, UK) following the  
163 manufacturer's guidelines. Data are presented as secreted insulin/insulin content.

164 *Electrophysiology*

165 Electrophysiological recordings were performed on single  $\beta$ -cells in perforated patch-clamp  
166 configuration using an EPC9 patch-clamp amplifier controlled by Pulse acquisition software  
167 (Heka Elektronik, Pfalz, Germany).  $\beta$ -cells were identified morphologically and by  
168 depolarisation of the membrane potential in response to 17 mM glucose.  $\beta$ -cells were  
169 constantly perfused at 32 °C with normal saline solution (135mM NaCl, 5mM KCl, 1mM  
170 MgCl<sub>2</sub>, 1mM CaCl<sub>2</sub>, 10mM HEPES). Recording electrodes had resistances of 8-10 M $\Omega$  and  
171 were filled with a solution comprised of 140mM KCl, 5mM MgCl<sub>2</sub>, 3.8mM CaCl<sub>2</sub>, 10mM  
172 HEPES, 10mM EGTA (pH 7.2) and 20–25  $\mu$ g/ml amphotericin B (Sigma-Aldrich).

173 Voltage-dependent calcium channel (VDCCs) currents were recorded from dispersed mouse  
174  $\beta$ -cells as previously described (22).

175  *$\beta$ -cell mass*

176 Whole pancreatic optical projection tomography, to 19  $\mu$ m resolution, was performed as  
177 described (23).

178

179 *Statistical Analysis*

180 Data are expressed as mean  $\pm$  SEM except for small datasets (n<3), where data are shown as  
181 mean  $\pm$  S.D. Significance was tested by Student's two-tailed t-test, one or two-way ANOVA

182 with Sidak's or Bonferroni multiple comparison test for comparison of more than two groups,

183 using GraphPad Prism 7 software.  $p < 0.05$  was considered significant.

184

185 **Results**

186 ***Mcu* ablation from pancreatic  $\beta$ -cells attenuates GSIS *in vitro***

187 To ablate MCU from pancreatic  $\beta$ -cells, animals bearing alleles in which *LoxP* sites flanked  
188 exons 11 and 12 of the *Mcu* gene were generated (See Materials and Methods) and crossed to  
189 mice harbouring *Cre* recombinase inserted at the *Ins1* locus (16) (**Fig. 1A**). This strategy  
190 ensured targeted deletion of the longer splice variant of *Mcu*, which predominates in islets  
191 (results not shown), whilst excluding any compensatory increase in the expression of the  
192 shorter variant. *Mcu* deletion was confirmed by qRT-PCR (**Fig. 1B**). Relative to  $\beta$ -Actin (*Actb*),  
193 expression of the *Mcu* transcript in KO islets was decreased by ~75% *vs* control islets ( $p < 0.05$ ;  
194 **Fig. 1B**). This level of reduction is consistent with near-complete elimination of *Mcu* mRNA  
195 from  $\beta$ -cells, assuming a  $\beta$ :- $\alpha$ -cell ratio of ~3:1 (24) and similar levels of *Mcu* expression in  
196 each cell type in WT islets (25).

197 We next explored the consequences for glucose-stimulated insulin secretion in isolated  $\beta$ MCU-  
198 KO islets. In perfusion experiments,  $\beta$ MCU-KO islets displayed a significant blunting in the  
199 secretory response to elevated glucose, with the attenuation in insulin release most evident at  
200 high glucose concentrations (17 mM), as determined at the first peak ( $p < 0.05$ ; **Fig. 1C**). These  
201 results were confirmed by independent experiments involving batch incubation of islets  
202 ( $p < 0.01$ ; **Fig. 1D**). In contrast,  $\beta$ MCU-KO islets displayed no difference *vs* control islets in  
203 insulin secretion stimulated by depolarisation with 20 mM KCl in either system (data not  
204 shown).

205

206 **MCU deletion from pancreatic  $\beta$ -cells impairs glucose-stimulated mitochondrial but not**  
207 **cytosolic  $\text{Ca}^{2+}$  uptake**

208 Since MCU provides the main route for  $\text{Ca}^{2+}$  entry into mitochondria in other cell types (26),  
209 we first determined the impact of deleting *MCU* on this process in pancreatic  $\beta$ -cells. Changes  
210 in mitochondrial free  $\text{Ca}^{2+}$  concentration ( $[\text{Ca}^{2+}]_{\text{mt}}$ ) were investigated by live cell fluorescence  
211 microscopy using whole or dissociated islets expressing an adenovirus (mito Pericam), or a  
212 genetically-encoded  $\text{Ca}^{2+}$  indicator (R-GECO), respectively (21). After pre-incubation in the  
213 presence of low (3 mM) glucose, increases in  $[\text{Ca}^{2+}]_{\text{mt}}$  were provoked in control islets or  $\beta$ -cells  
214 by stimulation with high (17 mM) glucose or plasma membrane depolarisation with KCl (20  
215 mM). A depolarising  $\text{K}^+$  concentration and the  $\text{K}_{\text{ATP}}$  channel opener diazoxide were then  
216 deployed together to bypass glucose regulation of the  $\text{K}_{\text{ATP}}$  channel (**Fig. 2C', E'**).

217 *Mcu* deletion attenuated glucose-stimulated increases in  $[\text{Ca}^{2+}]_{\text{mt}}$  in dissociated islets (**Fig. 2A-**  
218 **B**), as demonstrated within normalised traces and by determination of the mean area under the  
219 curve at 17mM glucose (AUC;  $p < 0.05$ ). The  $[\text{Ca}^{2+}]_{\text{mt}}$  increase in response to depolarisation  
220 with KCl was largely maintained in  $\beta\text{MCU-KO}$ . The  $[\text{Ca}^{2+}]_{\text{mt}}$  was also assessed in whole islets  
221 using mito Pericam where a trend towards reduced mitochondrial  $\text{Ca}^{2+}$  uptake was observed  
222 (**Fig. 2C-D**). To determine whether the impaired  $[\text{Ca}^{2+}]_{\text{mt}}$  changes in  $\beta\text{MCU-KO}$   $\beta$ -cells may  
223 simply reflect altered cytosolic  $\text{Ca}^{2+}$  ( $[\text{Ca}^{2+}]_{\text{cyt}}$ ) dynamics, the latter were also explored using  
224 the  $\text{Ca}^{2+}$ -sensitive dye (Cal-520) in whole islets. Interestingly,  $[\text{Ca}^{2+}]_{\text{cyt}}$  increases in whole  
225  $\beta\text{MCU-KO}$  islets were significantly increased in response to glucose in comparison to WT  
226 animals (AUC;  $p < 0.001$ ; **Fig. 2E, F**).

227 **MCU deletion from pancreatic  $\beta$ -cells reduces mitochondrial ATP production and**  
228 **cytosolic accumulation whereas mitochondrial membrane depolarisation decreases in**  
229 **response to glucose**

230 Given the significant reduction in GSIS observed in  $\beta$ MCU-KO islets *in vitro* and despite  
231 improved cytosolic  $\text{Ca}^{2+}$  dynamics, we next sought to determine whether an alteration in  
232 glucose metabolism might contribute to the attenuated insulin secretion. To address this, we  
233 utilised real-time fluorescence imaging of the ATP sensor, Perceval (9). A rise in the ATP:ADP  
234 ratio was prompted in control  $\beta$ -cells by a step increased in glucose from 3 to 17 mM (9). This  
235 change was significantly blunted in *Mcu* null  $\beta$ -cells (AUC;  $p < 0.05$ ; **Fig. 3A, B**). This was  
236 accompanied by a potentiation in the increase in mitochondrial membrane potential ( $\Delta\psi_m$ ), as  
237 assessed by monitoring TMRE fluorescence in  $\beta$ MCU-KO mouse  $\beta$ -cells (AUC<sub>700-720s</sub>;  
238  $p < 0.05$ ; **Fig. 3C, D**).

239 Altered ATP production in response to high glucose is expected to affect the activity of  $\text{K}_{\text{ATP}}$   
240 channels (27). Assessed in single  $\beta$ -cells using perforated patch-clamp electrophysiology (9),  
241 the extent of membrane potential depolarisation in response to a step increase in extracellular  
242 glucose from 3 to 17 mM did not differ significantly between  $\beta$ MCU-KO and control  $\beta$ -cells,  
243 although there was a trend towards weaker depolarisation in KO cells (**Fig. 3E, F**). VDCC  
244 currents, measured by whole-cell voltage clamp (22), displayed no apparent differences in  
245 response to 17 mM glucose (**Fig. 3G**). Interestingly expression of the  $\text{K}_{\text{ATP}}$  channel subunit  
246 *Kcnj11* was significantly elevated in  $\beta$ MCU-KO islets (AUC;  $p < 0.05$ ; **Fig. 3H**) any may  
247 contribute to reduced electrical activity (**Fig. 3E, F**).

248

## 249 Lowered $\beta$ -cell mass in MCU-deleted mice

250 Analysis using optical projection tomography (OPT; **Fig. 4A**) revealed that pancreata from  
251  $\beta$ MCU-KO mice displayed decreased numbers of islets at the extremes of the size spectrum  
252 ( $p < 0.01$ ) in comparison to WT mice (**Fig. 4B**) and a decrease in total  $\beta$ -cell volume (AUC;  
253  $p < 0.01$ ; **Fig. 4C**).

## 254 Loss of MCU from pancreatic $\beta$ -cells does not alter body mass or fed glycaemia but 255 impairs GSIS *in vivo*

256 We next explored the role of  $\beta$ -cell MCU in the control of insulin secretion and *in vivo* glucose  
257 homeostasis.  $\beta$ MCU-KO animals displayed normal growth and weight changes from 6 to 24  
258 weeks (**Fig. S1A**). However, male  $\beta$ MCU-KO mice showed a slight, but significant, increase  
259 ( $p < 0.05$ ) in weight gain from 20-24 weeks. We observed no differences in random fed blood  
260 glucose levels between  $\beta$ MCU-KO and control animals at all ages examined (**Fig. S1B**). No  
261 genotype-dependent differences in the above metabolic parameters were observed in female  
262 mice at any age (**Fig. S1C, S1D; Fig. S2A-D**).

263 Glucose tolerance was investigated in  $\beta$ MCU-KO and WT mice by intraperitoneal injection of  
264 1g/kg body weight glucose (IPGTT) at 8, 12, 16 and 24 weeks of age. A small but significant  
265 improvement in glucose tolerance was observed in male  $\beta$ MCU-KO mice *vs* controls at 8  
266 ( $p < 0.001$ ) or 12 ( $p < 0.05$ ) weeks of age (**Fig. 5A, B**). Older male animals displayed unaltered  
267 glucose tolerance (**Fig. 5C, D**) *vs* WT mice.

268 To assess GSIS *in vivo*, 8-10 week-old male mice were challenged with 3g/kg glucose and  
269 plasma insulin sampled at 0, 5, 15 and 30 min. (**Fig. 6A, B**). Although improved glucose  
270 tolerance was observed in  $\beta$ MCU-KO animals post 15 min. IP administration (**Fig. 6A**), a  
271 dramatic reduction ( $p < 0.001$ ) in insulin release was observed 5 min. post-glucose injection

272 **(Fig. 6B)**.  $\beta$ MCU-KO animals also displayed improved oral glucose tolerance at 15 and 30  
273 min. post-oral gavage (**Fig. 6C; p<0.05**), increased insulin secretion at 5 min. (**Fig. 6D;**  
274 **p<0.05**) vs WT littermates. No differences in intraperitoneal insulin tolerance (**Fig. 6 E, F**) or  
275 c-peptide levels (not shown) were observed between WT and KO mice.

276 Finally, to impose a metabolic stress,  $\beta$ MCU-KO mice and control littermates were maintained  
277 on a HFHS diet and subjected to the same tests as in (**Fig. 6A, B**). Again, no differences in  
278 glycaemia or insulin secretion were observed between phenotypes (**Fig. S3A, B**). No genotype-  
279 dependent differences in c-peptide secretion were apparent (not shown).

280

## 281 Discussion

282 Mitochondria are highly dynamic organelles which play an important role in maintaining  
283 normal  $\beta$ -cell function and secretory responses to glucose (28-30). As mitochondrial dynamics  
284 and biogenesis are impaired in the face of insulin resistance and in type 2 diabetes in these cells  
285 (8), it is conceivable that preserving the normal function of these organelles may slow the loss  
286 of normal insulin secretion and disease progression (31; 32).

287 Recent findings (10) have demonstrated the importance of MCU for  $\text{Ca}^{2+}$  uptake into  
288 mitochondria in several mammalian cell types, and established this as the most important route  
289 for  $\text{Ca}^{2+}$  accumulation into these organelles. In the present studies, efficient deletion of both  
290 MCU isoforms was achieved by targeting exons 11 and 12 of the *Mcu* gene using  
291 recombination with efficient and selective *Ins1Cre* deleter strain. This resulted in near complete  
292 elimination of a functional *Mcu* gene throughout the  $\beta$ -cell population *in vivo*. In agreement  
293 with previous studies using RNA silencing (9; 15), *Mcu* deletion attenuated GSIS and  
294 mitochondrial  $\text{Ca}^{2+}$  uptake in response to high glucose in dissociated islets (9). The response to  
295 depolarisation by KCl was less markedly affected, possibly reflecting the opening of other  
296 mitochondrial  $\text{Ca}^{2+}$  transporters/channels at high cytosolic [ $\text{Ca}^{2+}$ ] levels (33). Alternative  
297 mitochondrial  $\text{Ca}^{2+}$  entry pathways may involve ryanodine receptors, as observed on the inner  
298 mitochondrial membrane in neurons (34), or the rapid mode of mitochondrial  $\text{Ca}^{2+}$  uptake  
299 (RAM) in the liver. The existence of these pathways has not, as yet, been demonstrated in  
300 pancreatic  $\beta$ -cells.

301 Surprisingly, quantification of [ $\text{Ca}^{2+}$ ]<sub>cyt</sub> in intact islets demonstrated larger increases in  
302 response to high glucose in KO islets (**Fig.7A,B**), perhaps reflecting an impact on  $\text{Ca}^{2+}$   
303 oscillation frequency,  $\beta$  cell- $\beta$  cell communication and three-dimensional electrical  
304 communication through gap junctions (35). The sharp decrease in GSIS *in vitro* in the face of



305 higher cytosolic  $[Ca^{2+}]$  (**Fig.7B**) is, again, paradoxical and argues that lowered ATP:ADP,  
306 alongside impairments in amplifying processes (36), such as the  $Ca^{2+}$ -dependent intra-  
307 mitochondrial generation of putative coupling molecules such as glutamate (37), or others (2),  
308 exert a dominant, inhibitory effect on secretion in KO mice (see below).

309 Importantly, our observations support the view that  $Ca^{2+}$  accumulation by mitochondria  
310 stimulates ATP consumption, consistent with a reduction in glucose-stimulated ATP:ADP ratio  
311 in the KO mouse (6). Additionally, mitochondrial membrane potential was increased,  
312 particularly in glucose-stimulated conditions, in dissociated islets from KO vs WT mice. An  
313 increase in  $\Delta\psi_m$  in the face of lowered cytosolic ATP:ADP is consistent with a decrease in  
314  $F_1/F_0$ ATPase activity (38) (**Fig.7B**), an enzyme previously reported to be  $Ca^{2+}$  regulated in  
315 other tissues (8). Reduced mitochondrial  $Ca^{2+}$  extrusion via flux through the mitochondrial  
316  $Na^+/Ca^{2+}$  exchanger NCLX (electrogenic:  $3Na^+ : 1Ca^{2+}$ ) may also contribute (39). Additionally,  
317 lowered cytosolic ATP is expected to restrict  $Ca^{2+}$  pumping across the plasma membrane  
318 ( $Ca^{2+}$ ATPase), as well as into the endoplasmic reticulum (SERCA; **Fig.7B**). Of note, despite  
319 attenuated ATP increases and greater accumulation of cytosolic  $Ca^{2+}$ , we observed only a trend  
320 towards lower glucose-stimulated plasma membrane depolarisation and no significant  
321 difference in VDCC activity between WT and KO  $\beta$ -cells. Quantification of  $K_{ATP}$  channel  
322 subunit expression revealed elevated *Kcnj11* mRNA levels in  $\beta$ MCU-KO mice which,  
323 alongside lowered cytosolic ATP:ADP increases, is expected to lower membrane excitability  
324 (**Fig.7B**) and  $Ca^{2+}$  entry (40).

325 In addition to the above functional alterations,  $\beta$ MCU-KO mice displayed decreased  $\beta$ -cell  
326 mass. This may reflect either impaired proliferation or generation from progenitor cells in the  
327 absence of functional *Mcu*, or altered cell death (20). Of note, Zhao et al., (41) have recently

328 reported that down-regulation of MCU enhances autophagic death in neurons due to the  
329 activation of AMP-activated protein kinase (AMPK), a known regulator of  $\beta$ -cell mass (42).

330 Extending to the *in vivo* setting, the current and earlier (9; 15) *in vitro* data demonstrating roles  
331 for MCU in the control of glucose-induced insulin secretion, we show that insulin secretion is  
332 impaired in  $\beta$ MCU-KO *vs* control mice 5 min. post to intraperitoneal injection of glucose.  
333 Surprisingly, however, insulin secretion post-oral gavage was elevated in KO mice at 5 min.  
334 perhaps suggesting that gut-derived factors such as the gastric inhibitory polypeptide and  
335 glucagon-like peptide-1 (GIP and GLP-1) are partially responsible for the enhanced glucose-  
336 stimulated insulin secretion from the  $\beta$ -cells (43). Future studies will be necessary to explore  
337 this possibility.

338 Interestingly, earlier studies inactivating MCU globally in the mouse, or in selected tissues,  
339 have consistently reported relatively minor phenotypes (44). Global MCU null mice displayed  
340 relatively unimpaired cardiac and skeletal muscle function and respiration (11) despite a near-  
341 complete ablation of  $\text{Ca}^{2+}$  accumulation by mitochondria in these cells. The present results are  
342 thus in line with these earlier findings. It is still unknown why insulin secretion is acutely  
343 impaired 5 min. post intraperitoneal glucose administration in KO mice but compensatory  
344 mechanisms are likely to emerge after that period to maintain normal cellular energy  
345 homeostasis and signalling *in vivo*. One intriguing possibility, which may be of particular  
346 relevance to the nutrient-responsive  $\beta$ -cell, is that the mitochondrial  $\text{Na}^+$ - $\text{Ca}^{2+}$  exchanger  
347 NCLX operates in the reverse mode at low  $\Delta\psi_m$ , thus allowing  $\text{Ca}^{2+}$  influx (45) to provide a  
348 compensatory mechanism for the loss of MCU.

349 The findings here also provide evidence of a role for additional, mitochondrially-derived  
350 metabolic signals whose generation depends upon mitochondrial  $\text{Ca}^{2+}$  uptake and which serve  
351 to potentiate the actions of increased cytosolic  $\text{Ca}^{2+}$ . Such molecules have been proposed to

352 underlie the “amplification” ( $K_{ATP}$ -channel independent) component of glucose-stimulated  
353 insulin secretion (36) but still remain elusive. Recent studies have focused on mitochondrial  
354 pathways of glucose metabolism, and the generation of second messengers other than ATP that  
355 such pathways might generate. Islet  $\beta$ -cells express both pyruvate carboxylase (PC) and  
356 pyruvate dehydrogenase (PDH) in abundance, such that, in the fed state, pyruvate flows into  
357 mitochondrial metabolic pathways in roughly equal proportions through the anaplerotic and  
358 oxidative entry points (2; 46). Impairments in pyruvate/isocitrate cycle activity, and the  
359 generation of its by-products (notably  $\alpha$ -ketoglutarate ( $\alpha$ -KG) and NADPH) might therefore  
360 restrict normal insulin secretion in  $\beta$ MCU-KO mice (**Fig.7B**).

### 361 **Conclusion**

362 To the best of our knowledge, this study provides only the second description of a conditional  
363 null *Mcu* KO mouse and reveals a critical role for MCU-mediated mitochondrial  $Ca^{2+}$  influx  
364 in the pancreatic  $\beta$ -cell *in vitro* and *in vivo*. The mechanisms which compensate *in vivo* for  
365 defective insulin secretion in  $\beta$ MCU-KO mice, ensuring near-normal or improved glucose  
366 homeostasis will need further exploration in the future.

367 Our findings suggest that changes in MCU expression or activity may contribute to defective  
368 insulin secretion in some forms of diabetes. An alteration in the ratio of the active (MCUa)  
369 form of the channel versus MCUb, a dominant-negative form of the carrier (26), might also  
370 play a part in the disease process in some settings.

### 371 **Conflict of interest**

372 The authors declare that they have no conflicts of interest with the contents of this article.

373

374 **Funding**

375 G.A.R. was supported by a Wellcome Trust Senior Investigator Award (WT098424AIA) and  
376 Investigator Award (212625/Z/18/Z), MRC Programme grants (MR/R022259/1,  
377 MR/J0003042/1, MR/L020149/1) and Experimental Challenge Grant (DIVA,  
378 MR/L02036X/1), MRC (MR/N00275X/1), Diabetes UK (BDA/11/0004210,  
379 BDA/15/0005275, BDA16/0005485) and Imperial Confidence in Concept (ICiC) grants, and  
380 a Royal Society Wolfson Research Merit Award. I.L. was supported by Diabetes UK Project  
381 Grant 16/0005485. This project has received funding from the Innovative Medicines Initiative  
382 2 Joint Undertaking under grant agreement No 115881 (RHAPSODY). This Joint Undertaking  
383 receives support from the European Union's Horizon 2020 research and innovation programme  
384 and EFPIA. This work is supported by the Swiss State Secretariat for Education, Research and  
385 Innovation (SERI) under contract number 16.0097. RR was supported by grants from the  
386 Italian Ministries of Health (Ricerca Finalizzata.) and of Education, University and Research  
387 (FIRB), the European Union (ERC mitoCalcium, no. 294777), the National Institutes of Health  
388 (grant #1P01AG025532-01A1), the Italian Association for Cancer Research (AIRC IG18633),  
389 and Telethon-Italy (GGP16029).

390 **Author contributions**

391  
392 E.H, E.G. and G.dSX performed experiments and analysed data. F.S. and M.C.C. generated  
393 and amplified Perceval and R-GECO viruses. I.L. and A.M.S. were responsible for the  
394 maintenance and genotyping of mouse colonies. T.J.P. examined RNAseq data and designed  
395 experiments. R.R. provided reagents. G.A.R. designed the study and wrote the manuscript with  
396 E.H. and E.G., with input from all authors. G.A.R. is the guarantor of this work and, as such,  
397 had full access to all the data in the study and takes responsibility for the integrity of the data  
398 and the accuracy of the data analysis.

## 399 **Data and Resource Availability**

400 All data generated or analyzed during this study are included in the published article (and its  
401 online supplementary files). No applicable resources were generated or analyzed during the  
402 current study.

## 403 **Prior presentation**

404 Some of this work has been presented at the following conferences: as a poster at the EASD Annual  
405 conference, Lisbon, Portugal, September 2017, with an accompanying abstract in Haythorne, E.A.,  
406 Martinez-Sanchez, A., Rizzuto, R., and Rutter, G.A. The mitochondrial uniporter (MCUa) is required  
407 for glucose-stimulated mitochondrial Ca<sup>2+</sup> uptake and insulin secretion in mouse pancreatic beta cells,  
408 *Diabetologia*, **60**, Supp1, S1-S608. 431 (2017); as a poster at the Diabetes UK Annual Professional  
409 Conference, London, U.K., March 2018, with the accompanying abstract: Rutter, G.A. Haythorne, E.A.,  
410 Georgiadou, E., Da Silva Xavier, G., Pullen, T.J., Rizzuto, R., Martinez-Sanchez, A., McGinty, J.A.  
411 and French, P.M. Pancreatic beta cell-selective deletion of the mitochondrial Ca<sup>2+</sup> uniporter MCU  
412 impairs glucose stimulated insulin secretion in vitro but not in vivo. *Diabetic Med* 35:42 (2018). Data  
413 were also included in an oral presentation at a conference entitled “Mitochondrial Form and Function”  
414 at University College London, U.K., September 2017.

## 415 **Abbreviations**

- 416  $[Ca^{2+}]_{\text{cyt}}$ : Cytoplasmic  $Ca^{2+}$  concentration
- 417  $[Ca^{2+}]_{\text{mt}}$ : Mitochondrial  $Ca^{2+}$  concentration
- 418 ADP: Adenosine diphosphate
- 419 AMPK: Adenosine monphosphate-activated protein kinase
- 420 ANT: adenine nucleotide transferase
- 421 ATP: Adenosine triphosphate
- 422 AUC: Area under curve
- 423 FCCP: Carbonyl cyanide-4-phenylhydrazone
- 424 GIP: Gastric inhibitory polypeptide
- 425 GLP-1: Glucagon-like peptide-1
- 426 GSIS: Glucose-stimulated insulin secretion
- 427 HTRF: homogeneous time-resolved fluorescence-based assay
- 428 IPGTT: Intraperitoneal glucose tolerance test
- 429 KATP: ATP-sensitive  $K^+$  ( $K_{\text{ATP}}$ ) channels
- 430 KCl: Potassium chloride
- 431 KO : Knockout
- 432 MCU: Mitochondrial  $Ca^{2+}$  uniporter
- 433 NCLX:  $Na^+$ - $Ca^{2+}$  exchanger
- 434 OGTT :Oral gavage tolerance test
- 435 PC: Pyruvate carboxylase
- 436 PDH: Pyruvate dehydrogenase
- 437 RAM: Rapid mode of mitochondrial  $Ca^{2+}$  uptake
- 438 SERCA: Sarco/endoplasmic reticulum  $Ca^{2+}$ -ATPase
- 439 T2D: Type 2 diabetes
- 440 TCA: tricarboxylic acid
- 441 TMRE: Tetramethylrhodamine ethyl ester

- 442 VDCCS: Voltage-dependent  $\text{Ca}^{2+}$  channels
- 443 WT: Wild type
- 444  $\beta\text{MCU-KO}$ : Mitochondrial  $\text{Ca}^{2+}$  uniporter null animal in the beta cell
- 445  $\alpha\text{-KG}$ :  $\alpha$ -ketoglutarate
- 446  $\Delta\psi_m$ : Mitochondrial membrane potential

## 447 Reference List

- 448 1. Kahn SE, Zraika S, Utzschneider KM, Hull RL: The beta cell lesion in type 2 diabetes: there  
449 has to be a primary functional abnormality. *Diabetologia* 2009;52:1003-1012
- 450 2. Rutter GA, Pullen TJ, Hodson DJ, Martinez-Sanchez A: Pancreatic beta-cell identity,  
451 glucose sensing and the control of insulin secretion. *Biochem J* 2015;466:203-218
- 452 3. Rutter GA, Theler JM, Murgia M, Wollheim CB, Pozzan T, Rizzuto R: Stimulated Ca<sup>2+</sup>  
453 influx raises mitochondrial free Ca<sup>2+</sup> to supramicromolar levels in a pancreatic beta-cell line.  
454 Possible role in glucose and agonist-induced insulin secretion. *Journal of Biological Chemistry*  
455 1993;268:22385-22390
- 456 4. Kennedy ED, Rizzuto R, Theler JM, Pralong WF, Bastianutto C, Pozzan T, Wollheim CB:  
457 Glucose-stimulated insulin secretion correlates with changes in mitochondrial and cytosolic  
458 Ca<sup>2+</sup> in aequorin-expressing INS-1 cells. *The Journal of Clinical Investigation* 1996;98:2524-  
459 2538
- 460 5. Denton RM, McCormack JG: On the role of the calcium transport cycle in heart and other  
461 mammalian mitochondria. *FEBS Lett* 1980;119:1-8
- 462 6. Drews G, Bauer C, Edalat A, Dufer M, Krippeit-Drews P: Evidence against a Ca(2+)-  
463 induced potentiation of dehydrogenase activity in pancreatic beta-cells. *Pflugers Arch*  
464 2015;467:2389-2397
- 465 7. Wiederkehr A, Wollheim CB: Mitochondrial signals drive insulin secretion in the pancreatic  
466 beta-cell. *Mol Cell Endocrinol* 2012;353:128-137
- 467 8. Anello M, Lupi R, Spampinato D, Piro S, Masini M, Boggi U, Del Prato S, Rabuazzo AM,  
468 Purrello F, Marchetti P: Functional and morphological alterations of mitochondria in pancreatic  
469 beta cells from type 2 diabetic patients. *Diabetologia* 2005;48:282-289
- 470 9. Tarasov AI, Semplici F, Ravier MA, Bellomo EA, Pullen TJ, Gilon P, Sekler I, Rizzuto R,  
471 Rutter GA: The mitochondrial Ca<sup>2+</sup> uniporter MCU is essential for glucose-induced ATP  
472 increases in pancreatic beta-cells. *PLoS One* 2012;7:e39722
- 473 10. De Stefani D, Patron M, Rizzuto R: Structure and function of the mitochondrial calcium  
474 uniporter complex. *Biochim Biophys Acta* 2015;1853:2006-2011
- 475 11. Pan X, Liu J, Nguyen T, Liu C, Sun J, Teng Y, Fergusson MM, Rovira, II, Allen M,  
476 Springer DA, Aponte AM, Gucek M, Balaban RS, Murphy E, Finkel T: The physiological role  
477 of mitochondrial calcium revealed by mice lacking the mitochondrial calcium uniporter. *Nat*  
478 *Cell Biol* 2013;15:1464-1472



- 479 12. Quan X, Nguyen TT, Choi SK, Xu S, Das R, Cha SK, Kim N, Han J, Wiederkehr A,  
480 Wollheim CB, Park KS: Essential role of mitochondrial Ca<sup>2+</sup> uniporter in the generation of  
481 mitochondrial pH gradient and metabolism-secretion coupling in insulin-releasing cells. *J Biol*  
482 *Chem* 2015;290:4086-4096
- 483 13. Hou T, Zhang X, Xu J, Jian C, Huang Z, Ye T, Hu K, Zheng M, Gao F, Wang X, Cheng  
484 H: Synergistic triggering of superoxide flashes by mitochondrial Ca<sup>2+</sup> uniport and basal  
485 reactive oxygen species elevation. *J Biol Chem* 2013;288:4602-4612
- 486 14. Tarasov AI, Semplici F, Li D, Rizzuto R, Ravier MA, Gilon P, Rutter GA: Frequency-  
487 dependent mitochondrial Ca(2+) accumulation regulates ATP synthesis in pancreatic  $\beta$  cells.  
488 *Pflugers Archiv : European journal of physiology* 2013;465:543-554
- 489 15. Alam MR, Groschner LN, Parichatikanond W, Kuo L, Bondarenko AI, Rost R, Waldeck-  
490 Weiermair M, Malli R, Graier WF: Mitochondrial Ca<sup>2+</sup> uptake 1 (MICU1) and mitochondrial  
491 Ca<sup>2+</sup> uniporter (MCU) contribute to metabolism-secretion coupling in clonal pancreatic  $\beta$ -  
492 cells. *Journal of Biological Chemistry* 2012;287:42453
- 493 16. Thorens B, Tarussio D, Maestro MA, Rovira M, Heikkila E, Ferrer J: Ins1(Cre) knock-in  
494 mice for beta cell-specific gene recombination. *Diabetologia* 2015;58:558-565
- 495 17. Ravier MA, Rutter GA: Isolation and culture of mouse pancreatic islets for ex vivo imaging  
496 studies with trappable or recombinant fluorescent probes. *Methods Mol Biol* 2010;633:171-  
497 184
- 498 18. Martinez-Sanchez A, Nguyen-Tu MS, Rutter GA: DICER Inactivation Identifies  
499 Pancreatic beta-Cell "Disallowed" Genes Targeted by MicroRNAs. *Mol Endocrinol*  
500 2015;29:1067-1079
- 501 19. Mehta ZB, Fine N, Pullen TJ, Cane MC, Hu M, Chabosseau P, Meur G, Velayos-Baeza A,  
502 Monaco AP, Marselli L, Marchetti P, Rutter GA: Changes in the expression of the type 2  
503 diabetes-associated gene VPS13C in the beta-cell are associated with glucose intolerance in  
504 humans and mice. *Am J Physiol Endocrinol Metab* 2016;311:E488-507
- 505 20. Hodson DJ, Mitchell RK, Bellomo EA, Sun G, Vinet L, Meda P, Li D, Li WH, Bugliani  
506 M, Marchetti P, Bosco D, Piemonti L, Johnson P, Hughes SJ, Rutter GA: Lipotoxicity disrupts  
507 incretin-regulated human beta cell connectivity. *The Journal of clinical investigation*  
508 2013;123:4182-4194
- 509 21. Wu J, Prole DL, Shen Y, Lin Z, Gnanasekaran A, Liu Y, Chen L, Zhou H, Chen SR,  
510 Usachev YM, Taylor CW, Campbell RE: Red fluorescent genetically encoded Ca<sup>2+</sup> indicators  
511 for use in mitochondria and endoplasmic reticulum. *Biochem J* 2014;464:13-22

- 512 22. Zhu L, Almaca J, Dadi PK, Hong H, Sakamoto W, Rossi M, Lee RJ, Vierra NC, Lu H, Cui  
513 Y, McMillin SM, Perry NA, Gurevich VV, Lee A, Kuo B, Leapman RD, Matschinsky FM,  
514 Doliba NM, Urs NM, Caron MG, Jacobson DA, Caicedo A, Wess J: beta-arrestin-2 is an  
515 essential regulator of pancreatic beta-cell function under physiological and pathophysiological  
516 conditions. *Nat Commun* 2017;8:14295
- 517 23. Sun G, Tarasov AI, McGinty J, McDonald A, da Silva Xavier G, Gorman T, Marley A,  
518 French PM, Parker H, Gribble F, Reimann F, Prendiville O, Carzaniga R, Viollet B, Leclerc I,  
519 Rutter GA: Ablation of AMP-activated protein kinase alpha1 and alpha2 from mouse  
520 pancreatic beta cells and RIP2.Cre neurons suppresses insulin release in vivo. *Diabetologia*  
521 2010;53:924-936
- 522 24. Elayat AA, el-Naggar MM, Tahir M: An immunocytochemical and morphometric study of  
523 the rat pancreatic islets. *Journal of anatomy* 1995;186 ( Pt 3):629-637
- 524 25. Benner C, van der Meulen T, Caceres E, Tigyi K, Donaldson CJ, Huisin MO: The  
525 transcriptional landscape of mouse beta cells compared to human beta cells reveals notable  
526 species differences in long non-coding RNA and protein-coding gene expression. *BMC*  
527 *Genomics* 2014;15:620
- 528 26. Mammucari C, Raffaello A, Vecellio Reane D, Rizzuto R: Molecular structure and  
529 pathophysiological roles of the Mitochondrial Calcium Uniporter. *Biochim Biophys Acta*  
530 2016;1863:2457-2464
- 531 27. Ashcroft FM, Rorsman P: K(ATP) channels and islet hormone secretion: new insights and  
532 controversies. *Nat Rev Endocrinol* 2013;9:660-669
- 533 28. Tarasov AI, Griffiths EJ, Rutter GA: Regulation of ATP production by mitochondrial  
534 Ca(2+). *Cell calcium* 2012;52:28-35
- 535 29. Wiederkehr A, Szanda G, Akhmedov D, Matakci C, Heizmann CW, Schoonjans K, Pozzan  
536 T, Spat A, Wollheim CB: Mitochondrial matrix calcium is an activating signal for hormone  
537 secretion. *Cell Metab* 2011;13:601-611
- 538 30. Civelek VN, Deeney JT, Shallosky NJ, Tornheim K, Hansford RG, Prentki M, Corkey BE:  
539 Regulation of pancreatic beta-cell mitochondrial metabolism: influence of Ca<sup>2+</sup>, substrate and  
540 ADP. *Biochem J* 1996;318 ( Pt 2):615-621
- 541 31. Mulder H, Ling C: Mitochondrial dysfunction in pancreatic beta-cells in Type 2 diabetes.  
542 *Mol Cell Endocrinol* 2009;297:34-40
- 543 32. Ma ZA, Zhao Z, Turk J: Mitochondrial dysfunction and beta-cell failure in type 2 diabetes  
544 mellitus. *Exp Diabetes Res* 2012;2012:703538

- 545 33. Bondarenko AI, Jean-Quartier C, Malli R, Graier WF: Characterization of distinct single-  
546 channel properties of Ca<sup>2+</sup> inward currents in mitochondria. *Pflugers Archiv : European journal*  
547 *of physiology* 2013;465:997-1010
- 548 34. Jakob R, Beutner G, Sharma VK, Duan Y, Gross RA, Hurst S, Jhun BS, J OU, Sheu SS:  
549 Molecular and functional identification of a mitochondrial ryanodine receptor in neurons.  
550 *Neurosci Lett* 2014;575:7-12
- 551 35. Rutter GA, Hodson DJ: Beta cell connectivity in pancreatic islets: a type 2 diabetes target?  
552 *Cell Mol Life Sci* 2015;72:453-467
- 553 36. Henquin JC: Triggering and amplifying pathways of regulation of insulin secretion by  
554 glucose. *Diabetes* 2000;49:1751-1760
- 555 37. Maechler P, Wollheim CB: Mitochondrial glutamate acts as a messenger in glucose-  
556 induced insulin exocytosis. *Nature* 1999;402:685-689
- 557 38. Balaban RS: The role of Ca(2+) signaling in the coordination of mitochondrial ATP  
558 production with cardiac work. *Biochimica et biophysica acta* 2009;1787:1334-1341
- 559 39. Palty R, Silverman WF, Hershinkel M, Caporale T, Sensi SL, Parnis J, Nolte C, Fishman  
560 D, Shoshan-Barmatz V, Herrmann S, Khananshvil D, Sekler I: NCLX is an essential  
561 component of mitochondrial Na<sup>+</sup>/Ca<sup>2+</sup> exchange. *Proc Natl Acad Sci U S A* 2010;107:436-  
562 441
- 563 40. Fridlyand LE, Jacobson DA, Philipson LH: Ion channels and regulation of insulin secretion  
564 in human beta-cells: a computational systems analysis. *Islets* 2013;5:1-15
- 565 41. Zhao M, Chen J, Mao K, She H, Ren Y, Gui C, Wu X, Zou F, Li W: Mitochondrial calcium  
566 dysfunction contributes to autophagic cell death induced by MPP(+) via AMPK pathway.  
567 *Biochem Biophys Res Commun* 2019;509:390-394
- 568 42. Kefas BA, Heimberg H, Vaulont S, Meisse D, Hue L, Pipeleers D, Van de Castele M:  
569 AICA-riboside induces apoptosis of pancreatic beta cells through stimulation of AMP-  
570 activated protein kinase. *Diabetologia* 2003;46:250-254
- 571 43. Salehi M, Aulinger B, D'Alessio DA: Effect of glycemia on plasma incretins and the  
572 incretin effect during oral glucose tolerance test. *Diabetes* 2012;61:2728-2733
- 573 44. Harrington JL, Murphy E: The mitochondrial calcium uniporter: mice can live and die  
574 without it. *J Mol Cell Cardiol* 2015;78:46-53
- 575 45. Samanta K, Mirams GR, Parekh AB: Sequential forward and reverse transport of the Na(+)  
576 Ca(2+) exchanger generates Ca(2+) oscillations within mitochondria. *Nat Commun*  
577 2018;9:156

578 46. Jensen MV, Joseph JW, Ronnebaum SM, Burgess SC, Sherry AD, Newgard CB: Metabolic  
579 cycling in control of glucose-stimulated insulin secretion. American journal of physiology  
580 Endocrinology and metabolism 2008;295:E1287-E1297

581

582 **Figure Legends**

583 **Figure 1. Isolated islets from  $\beta$ MCU-KO mice display attenuated glucose-stimulated**  
584 **insulin secretion *in vitro*.**

585 (A) Gene deletion was achieved by breeding mice carrying *Mcu* alleles with FloxP sites  
586 flanking exons 11 and 12 with mice bearing Cre recombinase inserted at the *Ins1* locus. (B)  
587 qRT-PCR quantification of *Mcu* expression (\* $p < 0.05$ ;  $n = 3$  mice per genotype). Values  
588 represent mean  $\pm$  SD. (C) Insulin secretion from islets isolated from  $\beta$ MCU-WT and KO mice  
589 during perfusion and (D) serial incubations of islets in batches at 3 mM (3G) or 17 mM glucose  
590 (17G). A significant decrease in insulin secretion was observed in islets isolated from KO mice  
591 during the first peak (A; 4-8 min.,  $p < 0.05$ ,  $n = 4-5$  mice per genotype; unpaired two-tailed  
592 Student's t-test). In (D), a significant decrease was observed between genotypes in secretion  
593 stimulated by 17 mM glucose ( $p < 0.01$ ; two-way ANOVA test and Sidak's multiple  
594 comparisons test) compared to WT mice ( $n = 6$  WT,  $n = 7$  KO animals). Blue circles,  $\beta$ MCU-  
595 WT, red squares,  $\beta$ MCU-KO mice.

596 **Figure 2. MCU deletion from pancreatic  $\beta$ -cells diminishes *in vitro* mitochondrial  $\text{Ca}^{2+}$**   
597 **uptake in dissociated islets but not cytoplasmic  $[\text{Ca}^{2+}]$  in whole islets.**

598 (A) Genetically-encoded recombinant  $\text{Ca}^{2+}$  probe, R-GECO, was used to assess mitochondrial  
599  $\text{Ca}^{2+}$  dynamics in response to 17 mM glucose and 20 mM KCl in dissociated  $\beta$ -cells. (B) AUC  
600 corresponding to the data shown in (A): \* $p < 0.05$ ;  $n = 5$  trials, 3 mice per genotype; data points  
601 correspond to individual trials; 8-15 min for stimulation with 17 mM glucose. (C') Each  
602 snapshot of isolated WT (upper panel) and KO (lower panel) islets was taken during the time  
603 points shown with an arrow. See also supplemental movies Pericam WT and Pericam KO. (C)  
604 Mitochondrial  $\text{Ca}^{2+}$  changes in response to 17 mM glucose (with or without diazoxide) and 20

605 mM KCl were assessed following mito Pericam infection. Traces represent mean normalised  
606 fluorescence intensity ( $F/F_{\min}$ ) over time. Scale bar= 50 $\mu$ m. (D) AUC corresponding to the  
607 data shown in (C):  $n=5-6$  trials, 3 mice per genotype; data points correspond to individual  
608 trials; no significant differences detected. (E') Each snapshot of isolated WT (upper panel) and  
609 KO (lower panel) islets was taken during the time points shown with an arrow. See also  
610 supplemental movies Cal-520 WT and Cal-520 KO. (E) Cytoplasmic  $Ca^{2+}$  changes in response  
611 to 17 mM glucose (with or without diazoxide) and 20 mM KCl were assessed following Cal-  
612 520 uptake. Traces represent mean normalised fluorescence intensity ( $F/F_{\min}$ ) over time. Scale  
613 bar= 50 $\mu$ m. (F) AUC corresponding to the data shown in (E): \*\*\* $p<0.001$ ;  $n=5$  trials, 3 mice  
614 per genotype; data points correspond to individual trials. Islets were isolated from 8-10 week  
615 old male mice maintained on standard chow diet. Values represent mean  $\pm$  SEM. AU, arbitrary  
616 unit; AUC, area under the curve. Statistical analyses were performed using two-way ANOVA  
617 tests and Sidak's correction for multiple comparisons.

618 **Figure 3. MCU ablation from pancreatic  $\beta$ -cells diminishes ATP production and**  
619 **mitochondrial membrane depolarisation in response to high glucose.**

620 (A) Changes in the ATP:ADP ratio in response to 17 mM glucose was examined in dissociated  
621  $\beta$ -cells using the ATP sensor Perceval. (B) AUC values corresponding to (A) ( $p<0.05$ ,  $n=6-7$   
622 trials, 3 mice per genotype; unpaired two-tailed Student's t-test). (C) Cells were loaded with  
623 TMRE to measure changes in  $\Delta\psi_m$ , and perfused with 3 mM, 17 mM glucose or 1 $\mu$ M FCCP  
624 as indicated. Traces represent normalised fluorescence intensity ( $F/F_{\min}$ ) over time. (D) AUC  
625 were determined from the data shown in (C): AUC<sub>700-720s</sub> peak at 17mM glucose ( $p<0.05$ ) and  
626 presented as mean of the values  $\pm$  SEM. Data points are from  $n=3$  mice per genotype (two  
627 trials per mouse). (E) Representative current-clamp recordings of individual  $\beta$ -cells from WT  
628 (upper trace) and  $\beta$ MCU-KO mice (lower trace) displaying the membrane potential response

629 from 3 to 17 mM glucose. (F) Mean membrane potential responses ( $n=5-7$  trials, 3 mice per  
630 genotype; two-way ANOVA test and Sidak's multiple comparisons test). (G) Activation of  $\beta$ -  
631 cell VDCCs in response to 17mM glucose and indicated voltage steps ( $n=23-24$  islets, 3 mice  
632 per genotype). (H) qRT-PCR quantification of *Kcnj11* and *Abb8* expression ( $*p<0.05$ ;  $n=4-6$   
633 mice per genotype; unpaired two-tailed Student's t-test and Mann Whitney correction). Islets  
634 were isolated from 8-10 week old male mice maintained on standard chow diet. Values  
635 represent mean  $\pm$  SEM. AU, arbitrary unit; AUC, area under the curve.

636 **Figure 4. Effect of *Mcu* deletion on  $\beta$ -cell mass.**

637 (A) Optical projection tomography shows images of representative pancreata stained with  
638 insulin (pseudo-colour, red) to indicate islets of different sizes. Scale bar=500 $\mu$ m. (B)  
639 Quantification of the number of islets indicates a significant ( $p<0.01$ ) decrease in smaller  
640 islets in  $\beta$ MCU-KO mice ( $n=6$  animals per genotype). (C) Changes in overall  $\beta$ -cell mass  
641 (Area under the curve, AUC;  $p<0.01$ ; unpaired two-tailed Student's t-test and Mann Whitney  
642 correction,  $n=6$  animals per genotype). Values represent mean  $\pm$  SEM.

643 **Figure 5. Male  $\beta$ MCU-KO mice display slightly improved glucose tolerance.**

644 Glucose tolerance was measured in male MCU-KO and littermate control (WT) mice by  
645 intraperitoneal injection of glucose (1g/kg body weight) at (A) 8, (B) 12, (C) 16 and (D) 24  
646 weeks of age. The AUC is shown to the right of each graph ( $p<0.05$  or  $p<0.001$ ,  $n=8-14$  mice  
647 per genotype).

648

649 **Figure 6.  $\beta$ MCU-KO mice display enhanced glucose tolerance following intraperitoneal**  
650 **or oral gavage glucose administration.**

651 (A) Glycaemia and (B) glucose (3 g/kg body weight)-induced insulin secretion were assessed  
652 in  $\beta$ MCU-KO and WT mice ( $p < 0.05$  or  $p < 0.001$ ; 8-10 weeks old,  $n = 6-9$  mice per genotype).  
653 (C) Plasma glucose and (D) insulin, during the oral glucose tolerance test in  $\beta$ MCU-KO and  
654 WT mice ( $p < 0.05$ ;  $n = 7-9$  per genotype). (E) Challenging 8-10 week-old male mice with a 0.75  
655 U/kg body weight insulin injection showed normal insulin sensitivity. (F) The AUC is also  
656 shown ( $n = 5$  mice per genotype). All mice were maintained on a standard chow diet. Values  
657 represent mean  $\pm$  SEM. AU, arbitrary unit; AUC, area under the curve.

658 **Figure 7. Putative involvement of MCU in coordinating the response of  $\beta$ -cells to**  
659 **nutrient supply, and impact of MCU deletion on GSIS.**

660 (A) Glucose is taken up by  $\beta$ -cells and catabolised glycolytically. The formed pyruvate is  
661 metabolised by mitochondria through the citrate (TCA) cycle, leading to an increased  
662 mitochondrial proton motive force (hyperpolarised  $\Delta\psi_m$ ) and accelerated ATP synthesis. By  
663 entering mitochondria via the MCU,  $Ca^{2+}$  potentiates oxidative metabolism to counter-  
664 balance ATP consumption.  $Ca^{2+}$  exits mitochondria via NCLX. Consequently, the  
665 cytoplasmic ATP:ADP ratio rises, which causes further closure of ATP-sensitive  $K^+$   
666 channels, depolarisation of the plasma membrane potential ( $\Delta\psi_c$ ), opening of VDCCs, and  
667 influx of  $Ca^{2+}$ . Elevated  $[Ca^{2+}]_{cyt}$  triggers a number of ATP-dependent processes including  
668 insulin secretion and  $Ca^{2+}$  removal into the ER (sarco(endo)plasmic reticulum  $Ca^{2+}$  ATPase;  
669 SERCA) and extracellular medium (plasma membrane  $Ca^{2+}$  ATPase, PMCA). Mitochondrial  
670 metabolism is also activated by amino acids such as glutamate, citrate/malate which appear to  
671 be necessary for appropriate generation of regulatory, “amplifying” signals for insulin  
672 secretion. (B) Following MCU deletion,  $[Ca^{2+}]_{mito}$  is reduced leading to a more highly



673 polarised  $\Delta\psi_m$ , weaker oxidative or amino acid metabolism and ATP synthesis, perhaps due  
674 to a decrease in mitochondrial  $F_1F_0$ ATPase and/or adenine nucleotide transferase (ANT)  
675 activity. This is expected to result in result less closure of ATP-sensitive  $K^+$  channels ( $K_{ATP}$ ,  
676 further potentiated by increased expression of the SUR1 subunit, weaker plasma membrane  
677 depolarisation and  $Ca^{2+}$  influx. Importantly, lowered ATP supply to the cytosol is expected to  
678 restrict  $Ca^{2+}$  pumping across the plasma membrane, as well as into the ER. Despite reporting  
679 elevated  $[Ca^{2+}]_{cyt}$  in  $\beta$ MCU-KO mice, insulin secretion *in vitro* was impaired possibly due  
680 to lower  $Ca^{2+}$  dependent intra-mitochondrial generation of putative coupling molecules  
681 such as glutamate, citrate/malate.

682

**A**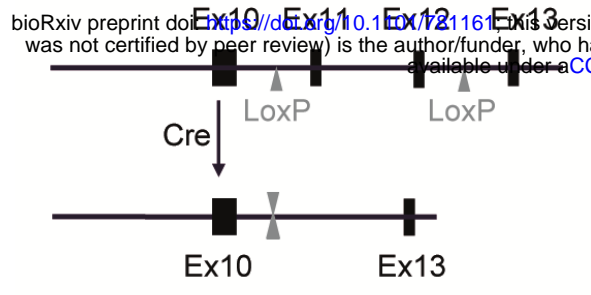**B**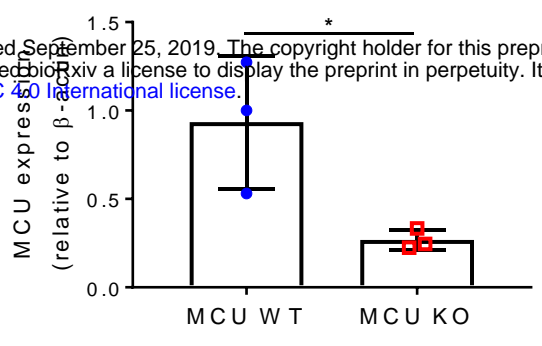**C**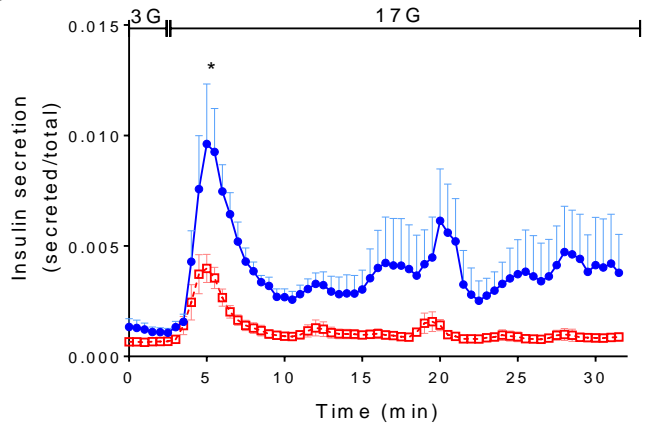**D**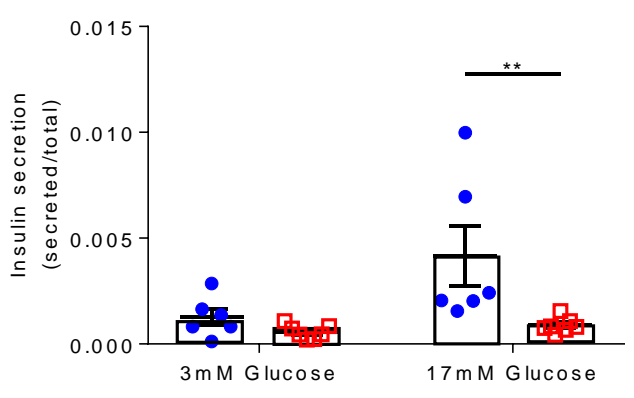**Fig. 1**

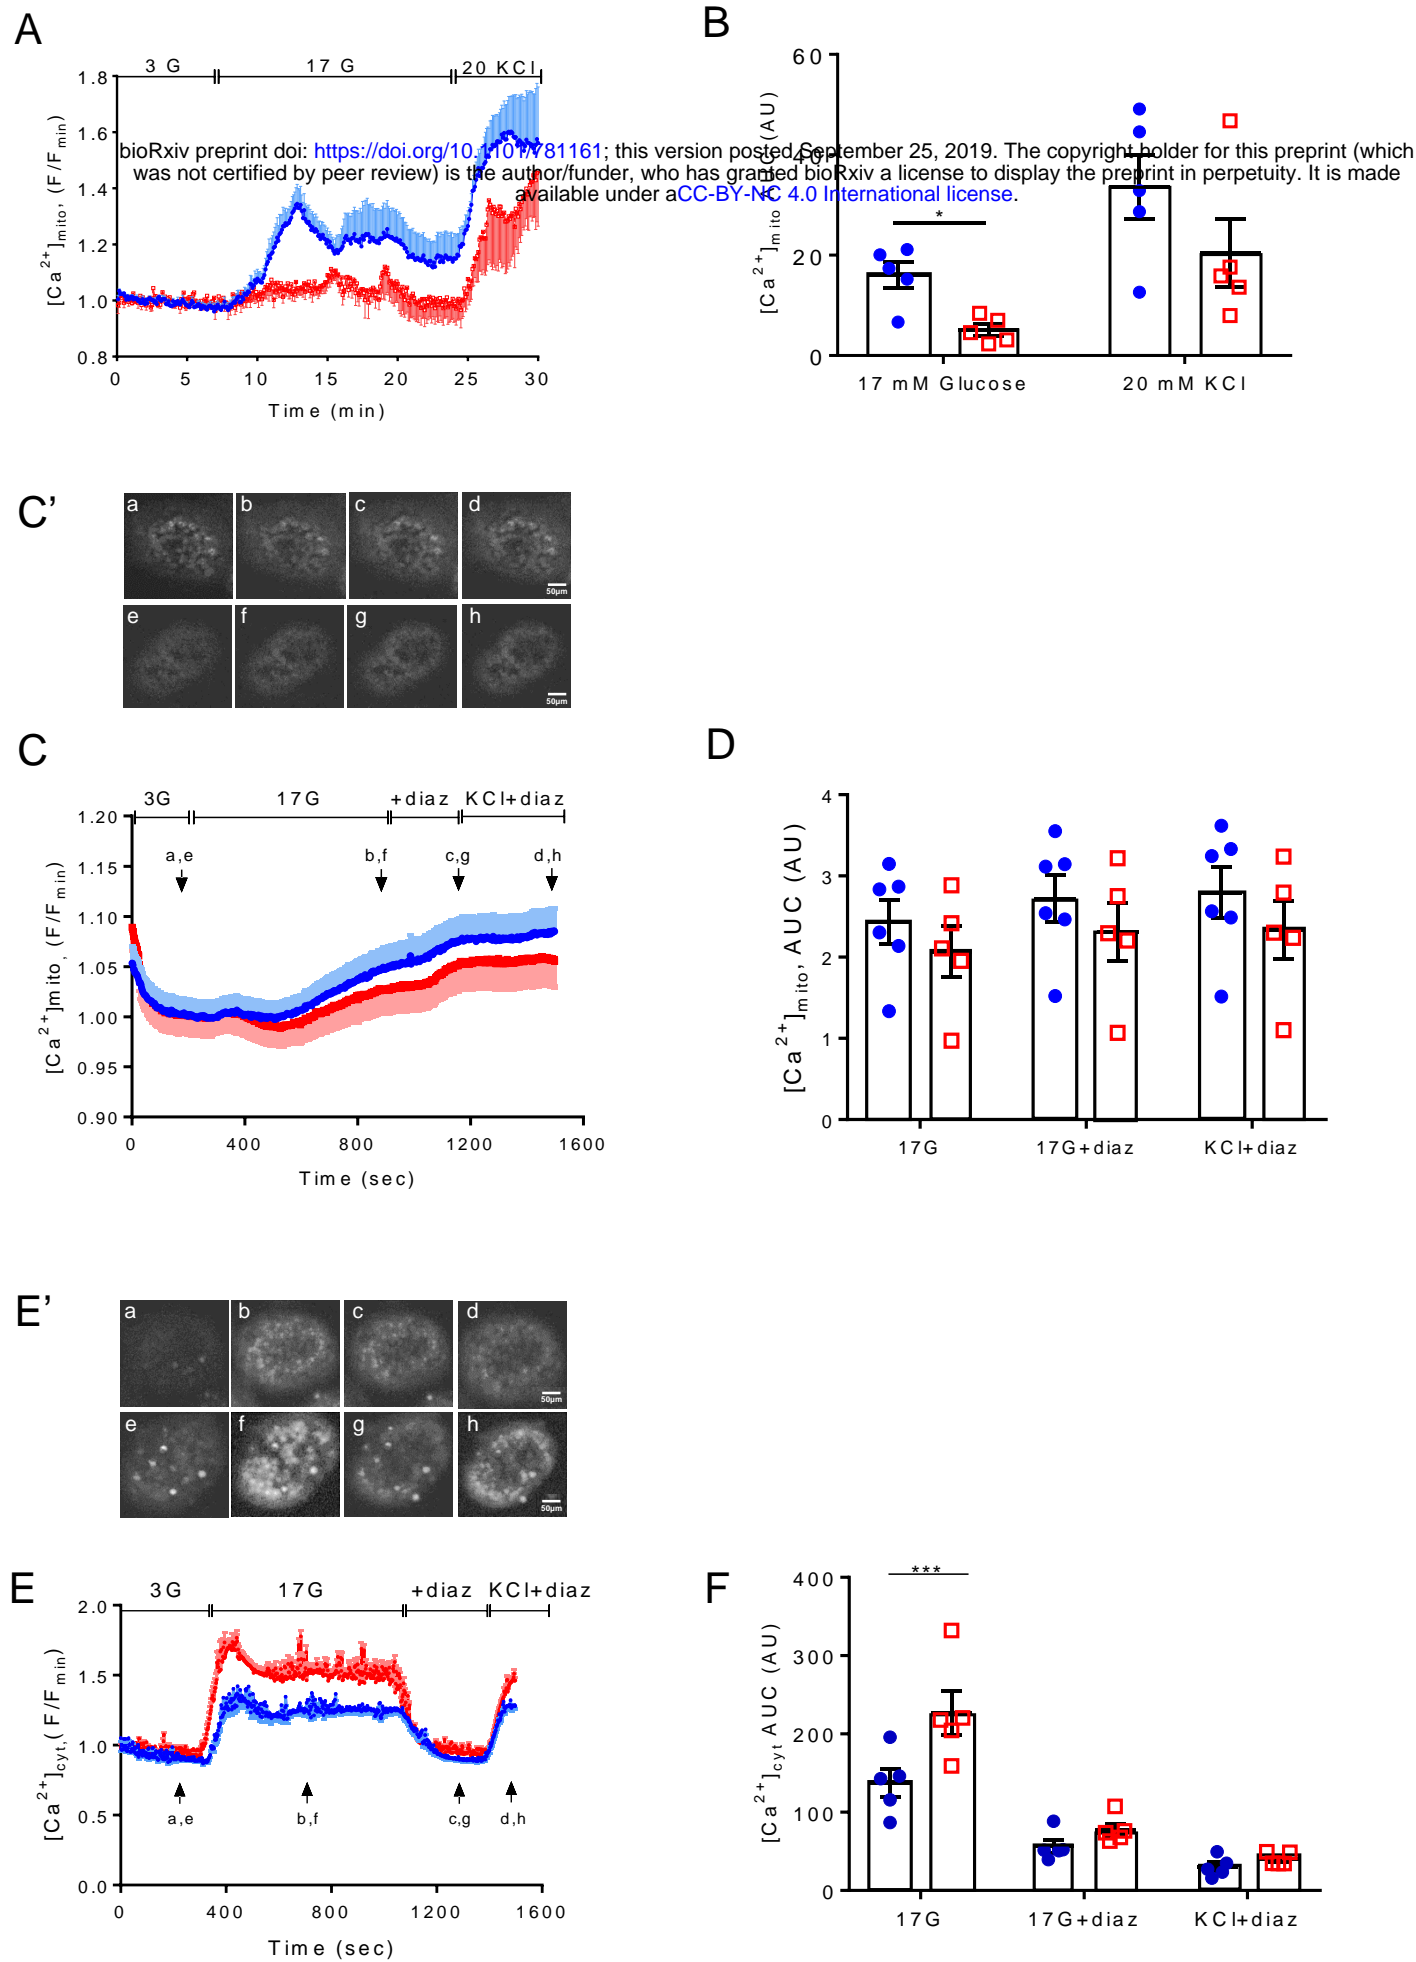

**Fig. 2**

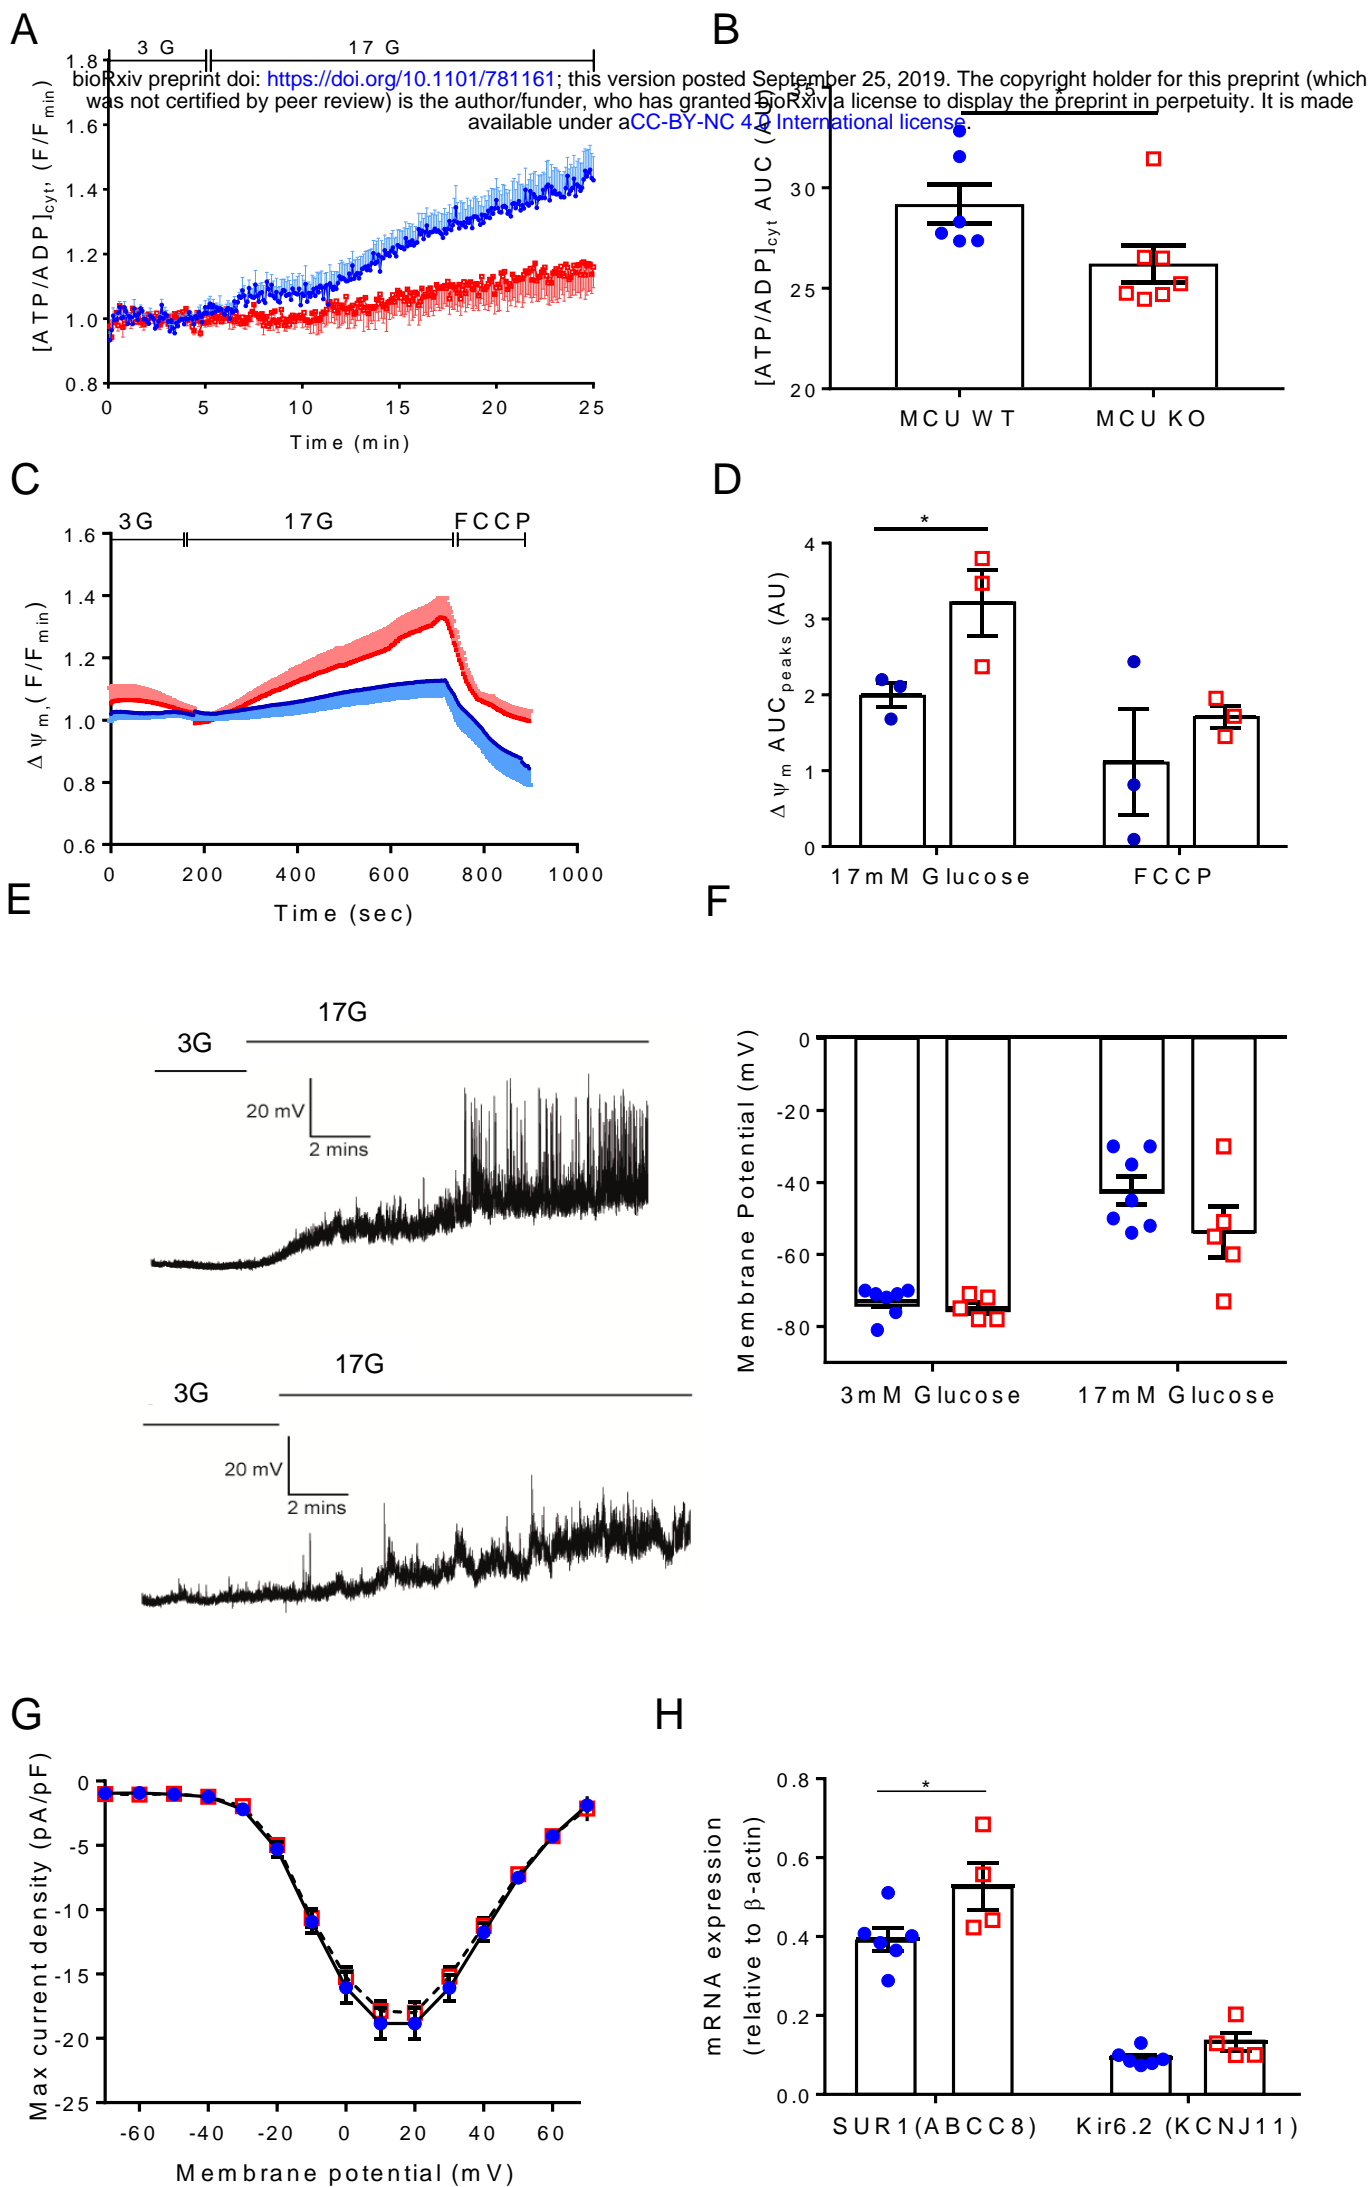

**Fig. 3**

A

bioRxiv preprint doi: <https://doi.org/10.1101/781163>; this version posted August 25, 2021. The copyright holder for this preprint (which was not certified by peer review) is the author/funder, who has granted bioRxiv a license to display the preprint in perpetuity. It is made available under aCC-BY-NC 4.0 International license.

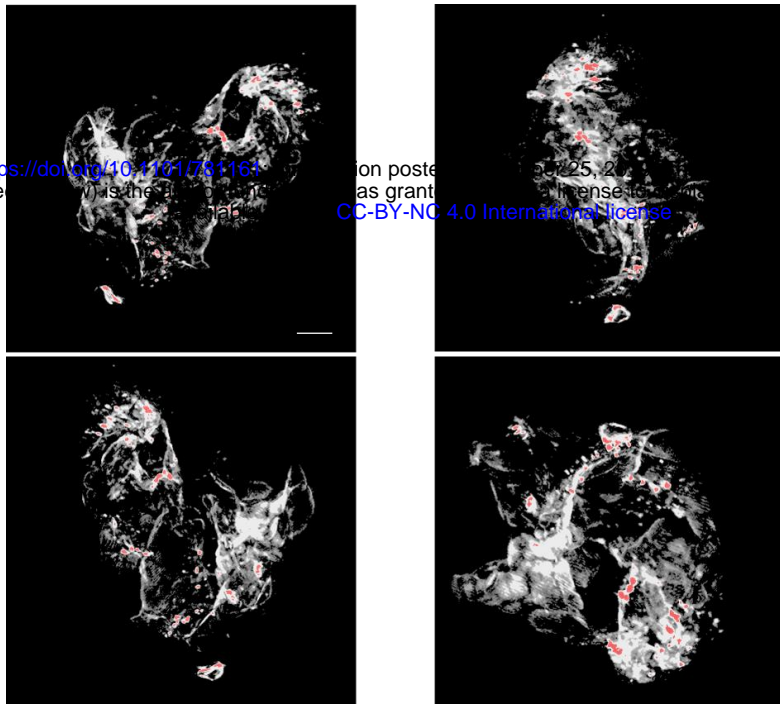

B

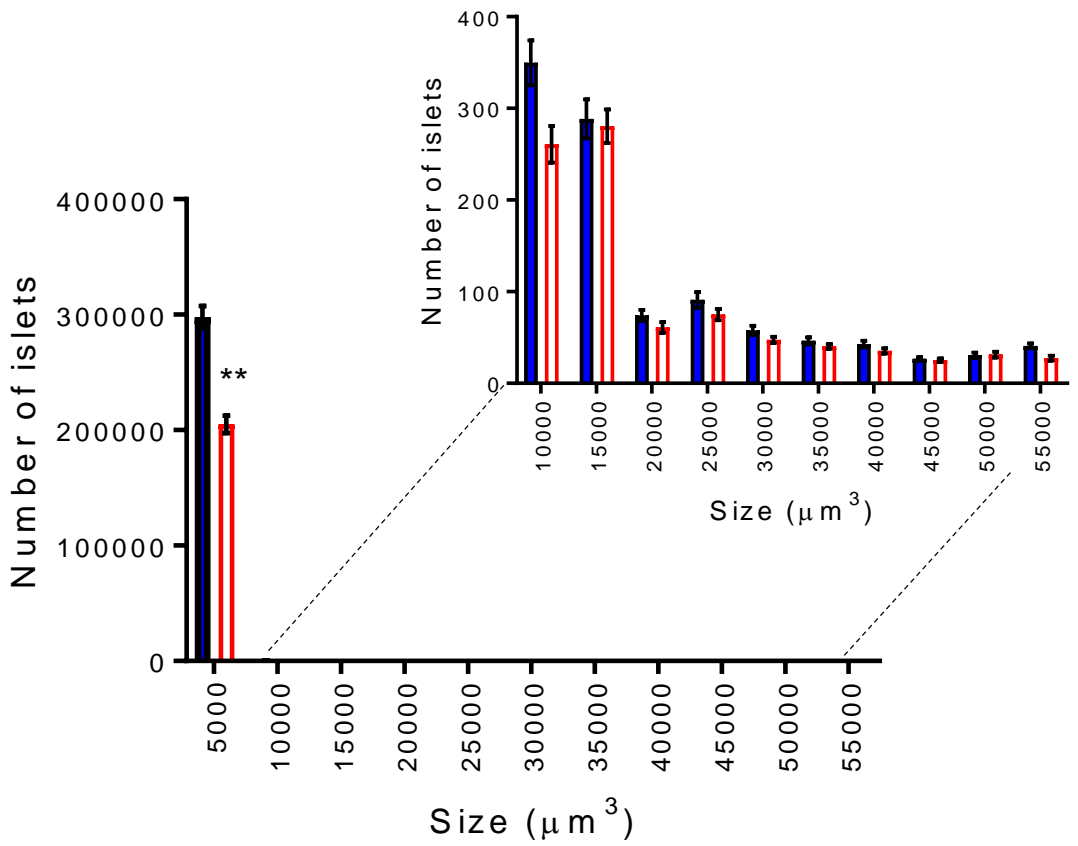

C

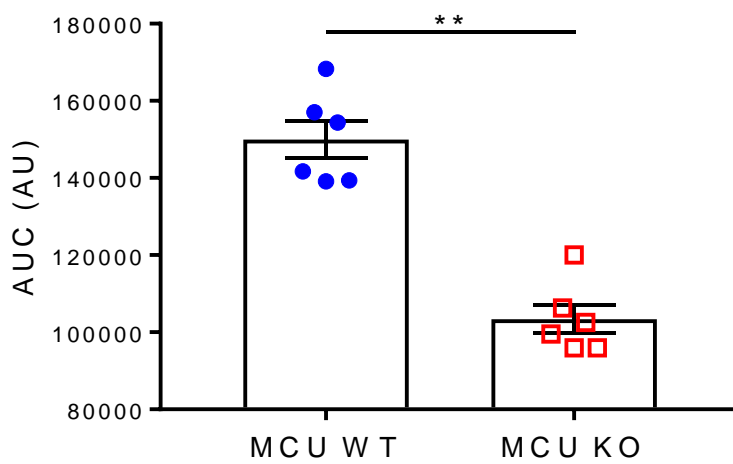

Fig. 4

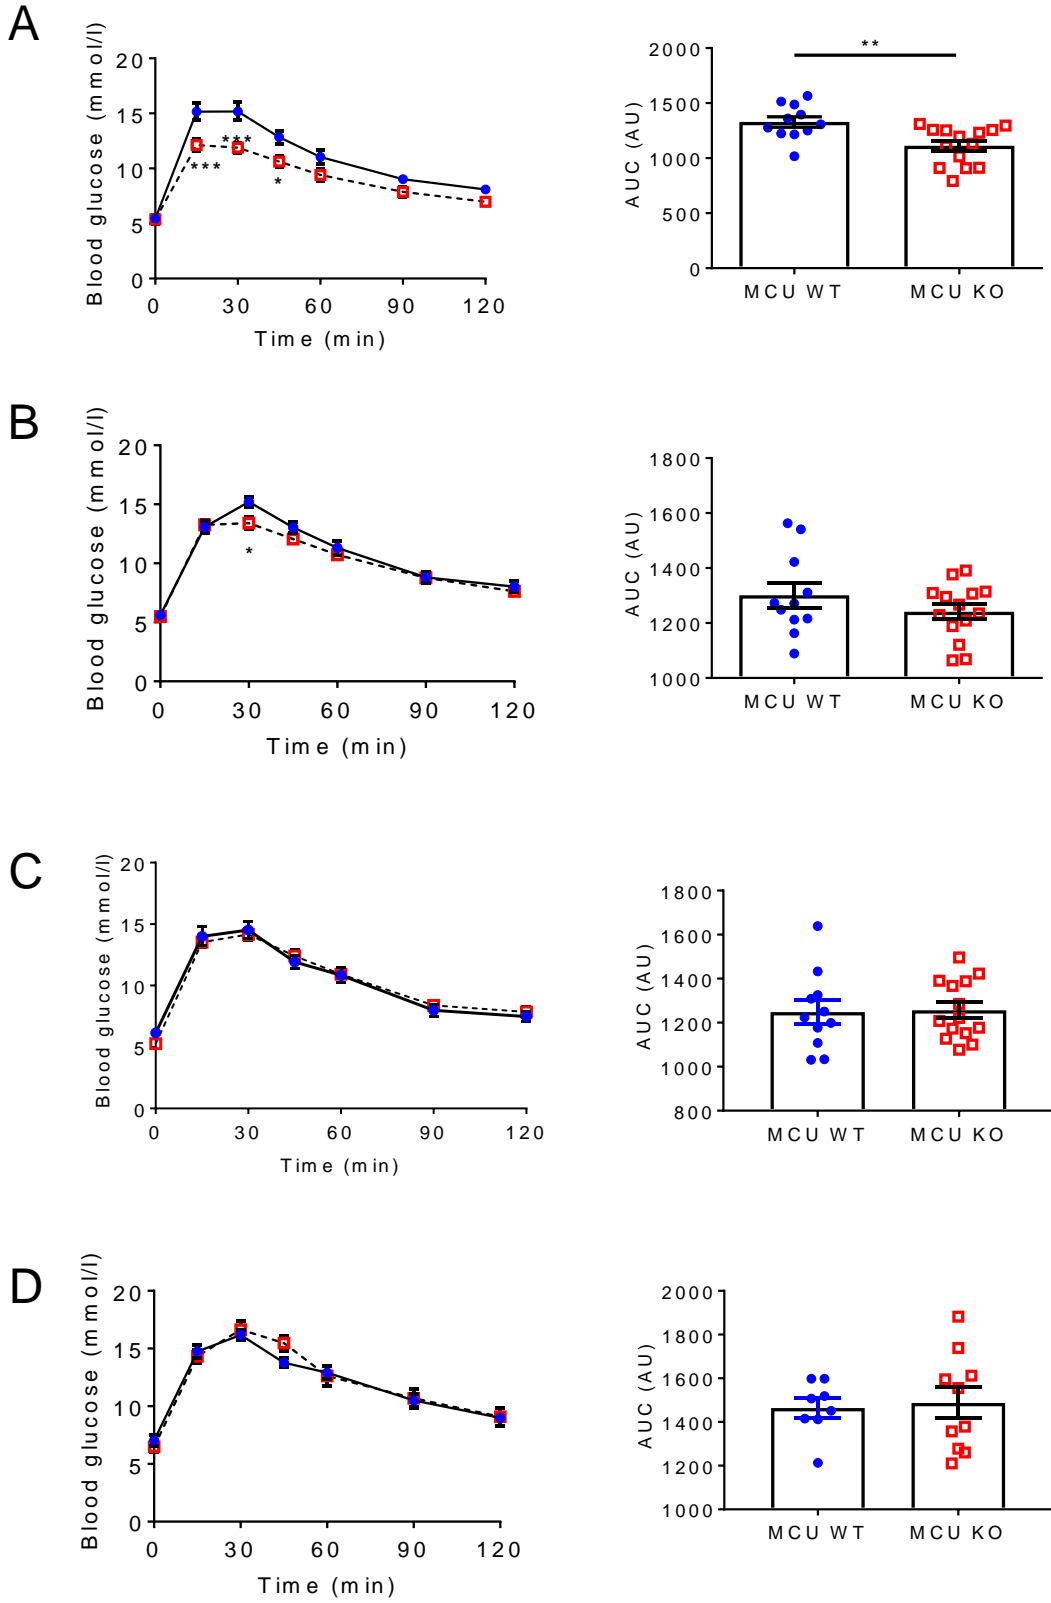

**Fig. 5**

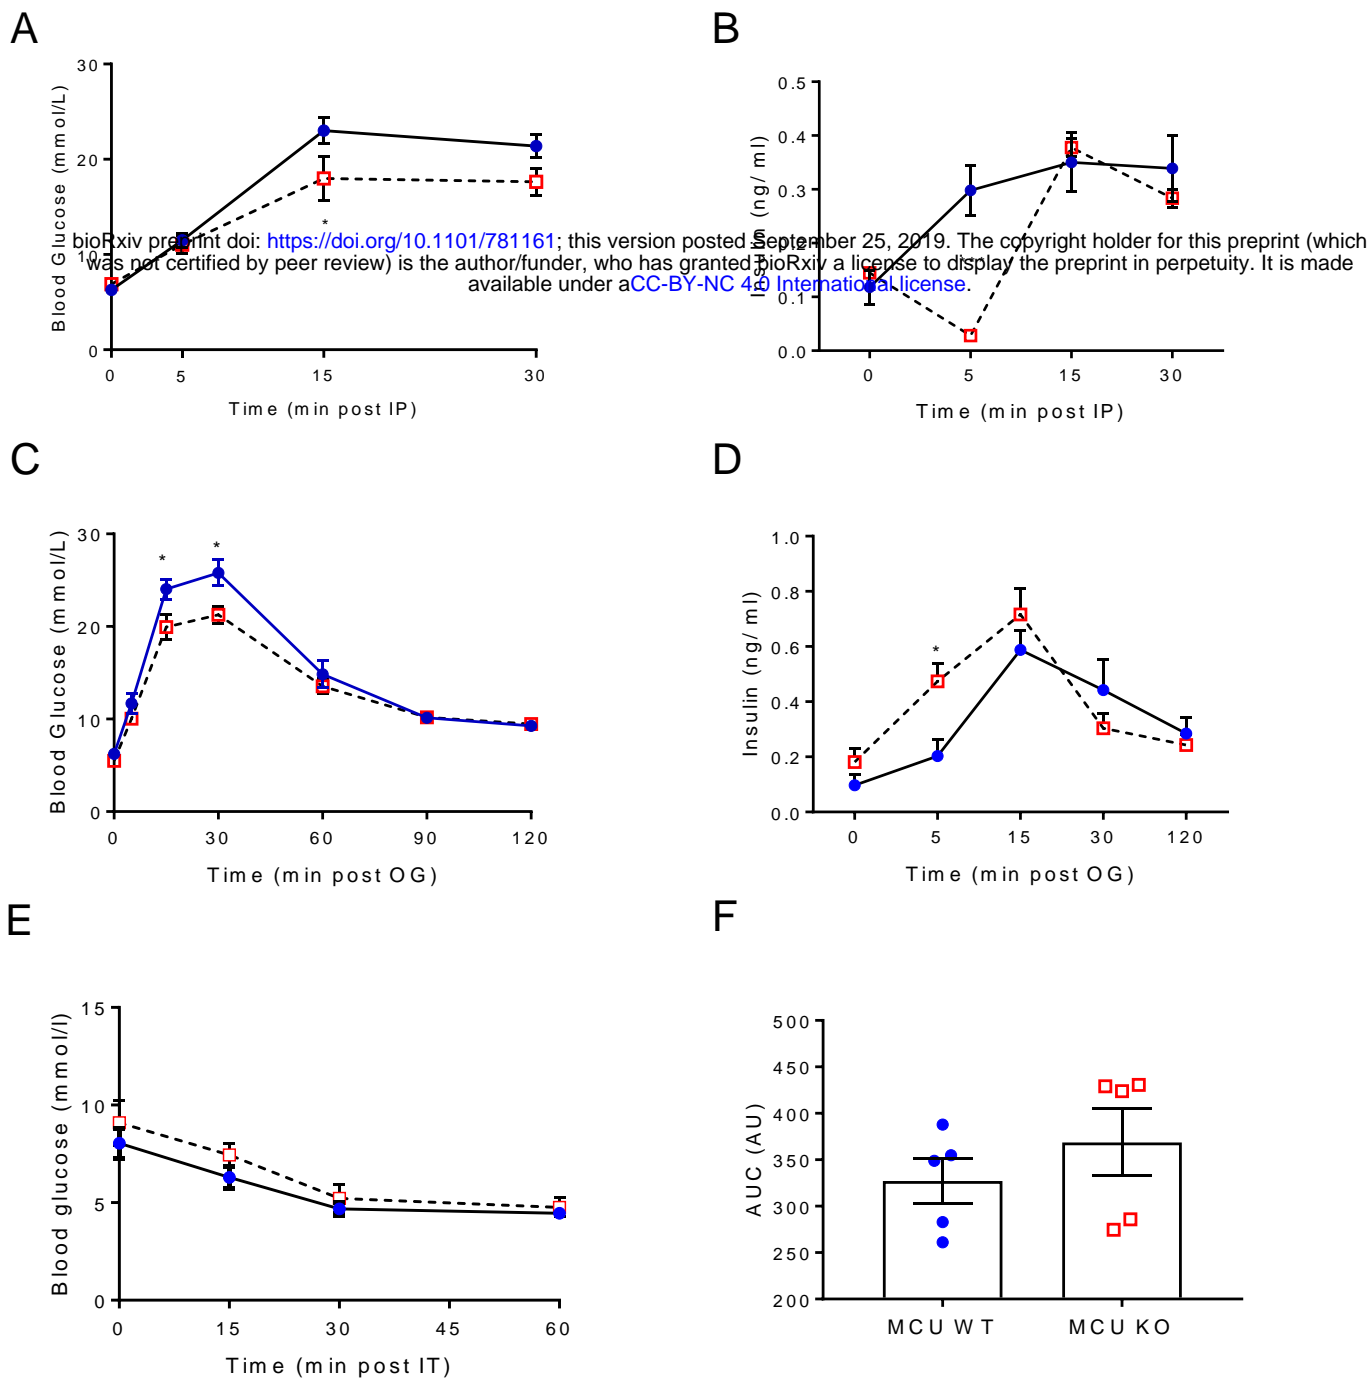

**Fig. 6**

A

WT

bioRxiv preprint doi: <https://doi.org/10.1101/781161>; this version posted September 25, 2019. The copyright holder for this preprint (which was not certified by peer review) is the author/funder, who has granted bioRxiv a license to display the preprint in perpetuity. It is made available under a [CC-BY-NC 4.0 International license](https://creativecommons.org/licenses/by-nc/4.0/).

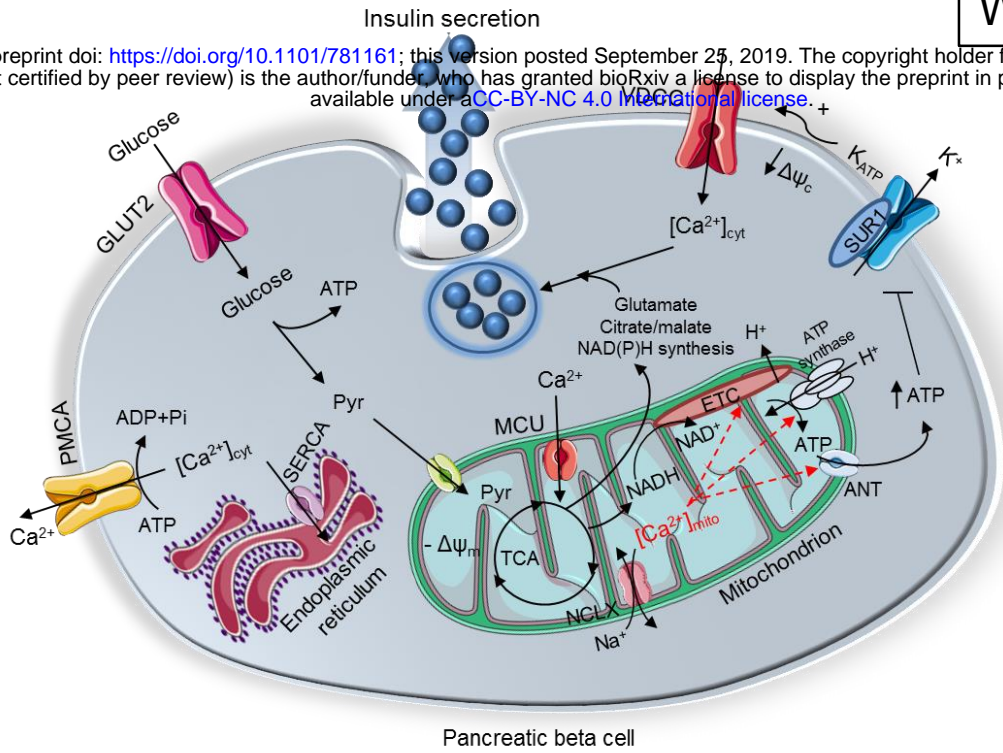

B

MCU KO

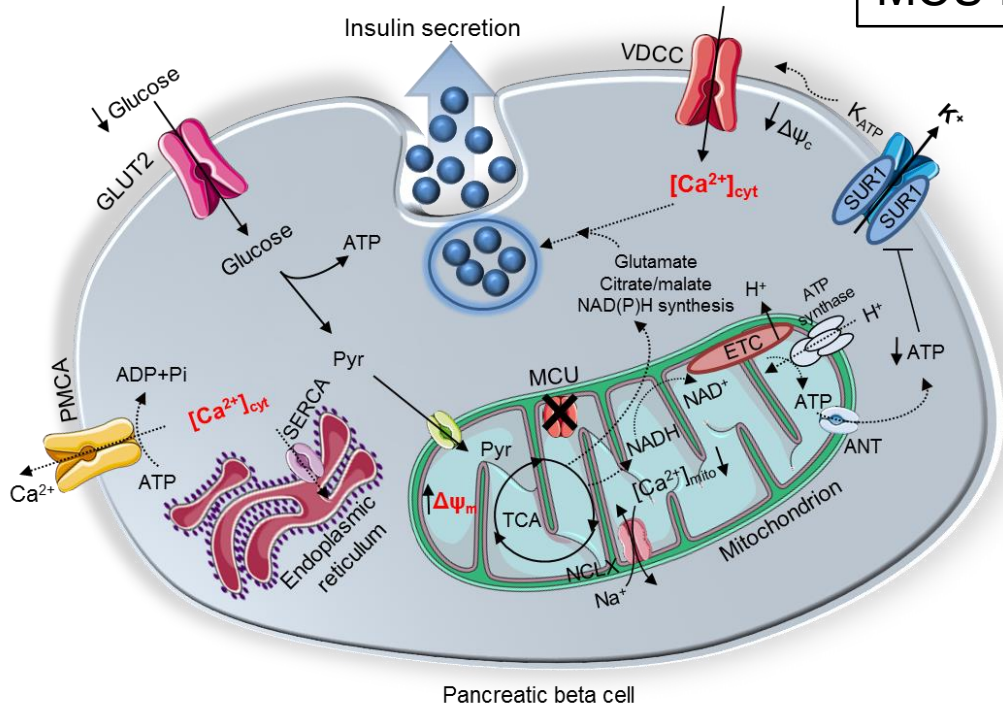

Fig. 7
